1 **Title**

2 Epigenomic signature of major congenital heart defects in newborns with Down syndrome

3

4 **Authors**

5 Julia S. Mouat<sup>1,2,3,4</sup>, Shaobo Li<sup>5</sup>, Swe Swe Myint<sup>5</sup>, Benjamin I. Laufer<sup>1,2,3,4</sup>, Philip J. Lupo<sup>6</sup>,

6 Jeremy M. Schraw<sup>6</sup>, John P. Woodhouse<sup>6</sup>, Adam J. de Smith<sup>\*5</sup>, Janine M. LaSalle<sup>\*1,2,3,4</sup>

7 \*Equal contributors

8 Corresponding author: Janine LaSalle, [jmlasalle@ucdavis.edu](mailto:jmlasalle@ucdavis.edu)

9

10 **Affiliations**

11 <sup>1</sup>Department of Medical Microbiology and Immunology, School of Medicine, University of  
12 California, Davis, CA USA

13 <sup>2</sup>Perinatal Origins of Disparities Center, University of California, Davis, CA USA

14 <sup>3</sup>Genome Center, University of California, Davis, CA USA

15 <sup>4</sup>MIND Institute, University of California, Davis, CA USA

16 <sup>5</sup>Center for Genetic Epidemiology, Department of Population and Public Health Sciences, Keck  
17 School of Medicine, University of Southern California, CA USA

18 <sup>6</sup>Division of Hematology-Oncology, Department of Pediatrics, Baylor College of Medicine,  
19 Houston, TX USA

20

21

22

23

24

25

26

27 **ABSTRACT**

28 **Background:** Congenital heart defects (**CHDs**) affect approximately half of individuals with Down  
29 syndrome (**DS**) but the molecular reasons for incomplete penetrance are unknown. Previous  
30 studies have largely focused on identifying genetic risk factors associated with CHDs in  
31 individuals with DS, but comprehensive studies of the contribution of epigenetic marks are lacking.  
32 We aimed to identify and characterize DNA methylation differences from newborn dried blood  
33 spots (**NDBS**) of DS individuals with major CHDs compared to DS individuals without CHDs.

34  
35 **Methods:** We used the Illumina EPIC array and whole-genome bisulfite sequencing (**WGBS**) to  
36 quantitate DNA methylation for 86 NDBS samples from the California Biobank Program: 1) 45  
37 DS-CHD (27 female, 18 male) and 2) 41 DS non-CHD (27 female, 14 male). We analyzed global  
38 CpG methylation and identified differentially methylated regions (**DMRs**) in DS-CHD vs DS non-  
39 CHD comparisons (both sex-combined and sex-stratified) corrected for sex, age of blood  
40 collection, and cell type proportions. CHD DMRs were analyzed for enrichment in CpG and genic  
41 contexts, chromatin states, and histone modifications by genomic coordinates and for gene  
42 ontology enrichment by gene mapping. DMRs were also tested in a replication dataset and  
43 compared to methylation levels in DS vs typical development (**TD**) WGBS NDBS samples.

44  
45 **Results:** We found global CpG hypomethylation in DS-CHD males compared to DS non-CHD  
46 males, which was attributable to elevated levels of nucleated red blood cells and not seen in  
47 females. At a regional level, we identified 58, 341, and 3,938 CHD-associated DMRs in the Sex  
48 Combined, Females Only, and Males Only groups, respectively, and used machine learning  
49 algorithms to select 19 Males Only loci that could distinguish CHD from non-CHD. DMRs in all  
50 comparisons were enriched for gene exons, CpG islands, and bivalent chromatin and mapped to  
51 genes enriched for terms related to cardiac and immune functions. Lastly, a greater percentage

52 of CHD-associated DMRs than background regions were differentially methylated in DS vs TD  
53 samples.

54  
55 **Conclusions:** A sex-specific signature of DNA methylation was detected in NDBS of DS-CHD  
56 compared to DS non-CHD individuals. This supports the hypothesis that epigenetics can reflect  
57 the variability of phenotypes in DS, particularly CHDs.

58  
59 **Keywords**  
60 Down syndrome, congenital heart defect, newborn dried blood spot, DNA methylation, whole-  
61 genome bisulfite sequencing, epigenetics, epigenome-wide association study, differentially  
62 methylated regions, nRBC, hypomethylation

63  
64 **List of abbreviations:**  
65 DS: Down syndrome  
66 CHD: Congenital heart defect  
67 AVSD: Atrioventricular septal defect  
68 WGBS: Whole-genome bisulfite sequencing  
69 NDBS: Newborn dried blood spot  
70 TD: Typical development  
71 DMR: Differentially methylated region  
72 QC: Quality control  
73 nRBC: Nucleated red blood cell  
74 PCA: Principal component analysis  
75 EPO: Erythropoietin  
76 TAM: Transient abnormal myelopoiesis

77

78 **MANUSCRIPT**

79

80 **1. Introduction**

81 Down syndrome (**DS**) is a set of distinct clinical features that result from trisomy 21, the most  
82 common autosomal aneuploidy across live births. Clinical characteristics of DS vary across  
83 individuals but include intellectual disability, short stature, muscle hypotonia, atlantoaxial  
84 instability, reduced neuronal density, cerebellar hypoplasia, and congenital heart defects (**CHDs**)  
85 (1). CHDs affect ~50% of newborns of both sexes with DS (2–5) despite their diagnosis in only  
86 ~1% of newborns without DS (6). The most frequently diagnosed CHD in children with DS is an  
87 atrioventricular septal defect (**AVSD**), a condition characterized by a large hole in the heart due  
88 to improper development of the endocardial cushion. Many cases of DS-CHDs, particularly AVSD,  
89 are diagnosed *in utero* by ultrasound, but others are not diagnosed until after birth following  
90 obvious symptoms or an echocardiogram and often require surgery.

91

92 The mechanisms influencing the development of CHDs among individuals with DS are not clear.  
93 Studies of partial trisomy 21 patients have pinpointed critical regions on chromosome 21,  
94 including the Down syndrome cell adhesion molecule (*DSCAM*) gene, that appear to underlie  
95 CHD development (7), but these have not addressed the incomplete penetrance among  
96 individuals with complete trisomy 21. Additionally, genome-wide association studies and  
97 candidate-gene approaches have identified variants on chromosomes throughout the genome  
98 that are associated with CHDs in DS (8–13). However, these genetic variants do not sufficiently  
99 explain CHD risk among those with DS.

100

101 Another molecular driver or biomarker of CHD risk in children with DS may be epigenetic  
102 mechanisms such as DNA methylation. Increasing evidence has shown epigenetic alterations  
103 and gene-environment interactions to be involved in the pathogenesis of non-syndromic CHDs

104 (14,15), but comprehensive studies of genome-wide DNA methylation variation associated with  
105 DS-CHD are lacking. We previously used whole-genome bisulfite sequencing (**WGBS**) of  
106 newborn dried blood spots (**NDBS**) to examine methylation profiles in 11 DS-CHD compared to  
107 10 DS non-CHD samples, as part of a larger DS vs typical development (**TD**) study (16). There  
108 were 1,588 nominally significant ( $p < 0.05$ ) differentially methylated regions (**DMRs**) (35%  
109 hypermethylated, 65% hypomethylated) distinguishing DS-CHD from DS non-CHD and these  
110 regions were enriched for terms related to the heart, as well as neurodevelopment and  
111 metabolism (16). These promising but preliminary results suggesting an epigenomic signature of  
112 CHD within DS led us to conduct the present study.

113  
114 This current study used WGBS of NDBS obtained from the California Biobank Program among  
115 86 DS individuals with and without major CHDs to identify specific loci, biological pathways, and  
116 genic contexts that are associated with risk for CHDs in the DS population. Very few studies have  
117 conducted WGBS on NDBS, a sample source that is accessible, widely banked, reflective of the  
118 intrauterine period, and informative regarding dysregulation in other tissues, including the brain  
119 and the heart (16). In contrast to reduced representation methods such as arrays, this WGBS  
120 study provides insight to the entire DS-CHD epigenome, particularly because regional methylation  
121 smoothing approaches increase confidence over regions with relatively low coverage.  
122 Additionally, our study investigates similarities/differences in molecular signatures of DS-CHD in  
123 males compared to females, as well as DS-CHD compared to DS (versus TD). Our findings  
124 showed sex-specific global and region-specific changes to methylation that may serve as  
125 biomarkers and/or be functionally important in the development of CHDs in individuals with DS.

126

## 127 **2. Methods**

### 128 **2.1 Study Populations and DNA extraction from NDBS**

129 This study was approved by Institutional Review Boards at the California Health and  
130 Human Services Agency, University of Southern California, and University of California,  
131 Davis. For the Discovery study, deidentified NDBS were obtained from 90 newborns with  
132 DS from the California Biobank Program (CBP, SIS request number 572), with a waiver  
133 of consent from the Committee for the Protection of Human Subjects of the State of  
134 California (17). Demographic and birth-related data, including sex, race/ethnicity,  
135 birthweight, gestational age, and age of blood collection were obtained from the CBP  
136 **(Supplemental Tables S1-S2)**. DS newborns with CHD or without CHD were identified  
137 via linkage between the California Department of Public Health Genetic Disease  
138 Screening Program and the California Birth Defects Monitoring Program (CBDMP). In  
139 brief, the CBDMP is a population-based surveillance program that covers ~30% of the  
140 births in California, including 10 counties, which are representative of the state's  
141 population (18). Birth defects diagnosis data from CBDMP for the 90 newborns were  
142 coded into "major birth defects" and "major heart defects" using guidelines from the  
143 National Birth Defects Prevention Network (6). Major defects included AVSD and tetralogy  
144 of Fallot. We identified 46/90 newborns with a CHD, of which 44 were AVSDs, and 3 had  
145 tetralogy of Fallot. For this study, we focused on major heart defects and following sample  
146 QC (described below) we included 45 DS with CHD (27 female, 18 male) and 41 DS  
147 without CHD (27 female, 14 male). DNA was extracted from one 4.7 mm card punch of  
148 each of the 90 NDBS, roughly 1.4cm in diameter, with the Beckman Coulter GenFind V3  
149 Reagent Kit (cat #C34880).

150

## 151 **2.2 Whole genome bisulfite sequencing**

152 All DNA samples were sonicated to ~350bp with a peak power of 175, duty of 10%, 200  
153 cycles/burst, and a time of 47 seconds. The sonicated DNA was cleaned and  
154 concentrated with Zymo gDNA clean and concentrator columns and eluted in 25  $\mu$ l EB.

155 Bisulfite conversion was performed with the Zymo EZ DNA Methylation Lightning Kit (cat  
156 #11-338) using ~35 ng of each sonicated sample. Libraries were prepared using the Swift  
157 ACCEL-NHS MethylSeq DNA Library Kit (cat #30096) with 7 cycles of PCR for normal-  
158 input samples and 11 cycles for low-input samples. Libraries were pooled and a 0.85X  
159 SPRI cleanup was performed on 250  $\mu$ l of the pool, eluted in 100  $\mu$ l. The library pool  
160 (concentration of 3.63 ng/  $\mu$ l) was sequenced across 4 lanes of an Illumina NovaSeq 6000  
161 S4 flow cell using 150 bp paired end reads.

162  
163 FASTQ files for each sample were merged across lanes using FASTQ\_Me (19) and  
164 aligned to the hg38 genome using CpG\_Me (20) with the default parameters (21–24). The  
165 alignment pipeline includes trimming adapters and correcting for methylation bias,  
166 screening for contaminating genomes, aligning to the reference genome, removing PCR  
167 duplicates, calculating coverage and insert size, and extracting CpG methylation to  
168 generate a cytosine report (CpG count matrix) and a quality control (**QC**) report. Global  
169 methylation for each sample was calculated as the total number of methylated CpG  
170 counts divided by the total number of CpG counts from CpG count matrices. From the 90  
171 samples sequenced, four samples were removed from analysis: two due to high levels of  
172 sequence duplication and two due to missing sample data.

173

### 174 **2.3 Genome-wide DNA methylation arrays**

175 In addition to WGBS, existing DNA methylation data was available from NDBS for each  
176 sample from Illumina Infinium MethylationEPIC (EPIC) DNA methylation arrays (17). In  
177 brief, DNA was isolated from a separate one-third portion of the NDBS, bisulfite  
178 conversion performed as above, and DNA samples were block-randomized (ensuring  
179 equivalent distribution of sex and race/ethnicity on each plate) for EPIC arrays (17). QC

180 of DNA methylation array data was conducted in R using “minfi”, “SeSAMe”, and “noob”  
181 packages, and trisomy 21 was confirmed from copy-number variation plots generated  
182 using the “conumee” package, as described (17). DMRs associated with DS-CHDs were  
183 investigated using the ipDMR method with the ENmix R package (25).

184

## 185 **2.4 Cell type estimation**

186 To estimate nucleated cell proportions in NDBS samples, we used the EPIC array data to  
187 perform reference-based deconvolution using the Identifying Optimal Libraries (IDOL)  
188 algorithm (26). Briefly, “estimateCellCounts2” function from the “FlowSorted.Blood.EPIC”  
189 R package was used to estimate proportions of CD8+ T lymphocytes (**CD8T**), CD4+ T  
190 lymphocytes (**CD4T**), natural killer (**NK**) cells, B lymphocytes (**B cell**), monocytes,  
191 granulocytes, and nucleated red blood cells (**nRBC**), using cord blood cell reference  
192 samples included in the “FlowSorted.CordBloodCombined.450k” R package.

193

## 194 **2.5 Sample trait analysis**

195 Newborn sample traits of global CpG methylation, birthweight, gestational age of delivery,  
196 age of blood collection, race, ethnicity, and cell type proportions were correlated using  
197 Pearson’s method with the Hmisc package v4.7.1 and *p*-values were adjusted by FDR  
198 (0.05 threshold) using the corr.test function in the Psych package v2.2.9 in Rv4.1.3. DS-  
199 CHD vs DS non-CHD samples (sex-combined and sex-segregated) were tested for  
200 differences across sample traits using Welch’s unpaired variances *t*-test with GraphPad  
201 Prism v9.4.1. Stepwise forward logistic regression was performed to determine the  
202 variables that best predicted CHD in each sex using the glm (family = binomial) function  
203 in R v4.1.3. Stepwise linear regression was performed to determine the variables that  
204 best predicted global CpG methylation in each sex using the lm function in R v4.1.3.

205



## 206        **2.6 DMR analysis from WGBS**

207            DMRs for DS-CHD vs DS non-CHD in the WGBS data were called for Sex Combined,  
208            Females Only, and Males Only samples using DMRichR v1.7.3 (16) and R version 4.1.0.  
209            Default parameters were used to identify DMRs containing at least 5 CpGs with at least a  
210            5% methylation difference between groups, with each CpG requiring at least 1x coverage  
211            in at least 75% of samples. DMRichR uses bsseq (27) to extract methylation levels from  
212            cytosine reports and dmrseq (28) to identify DMRs. The dmrseq algorithm detects  
213            candidate regions whose smoothed pooled methylation proportion show differences  
214            between groups, then assesses the significance of candidate regions through permutation  
215            testing of the pooled null distribution to calculate p-values that are then FDR corrected to  
216            generate q-values (28). In all three comparisons (Sex Combined, Females Only, and  
217            Males Only), we adjusted for sample traits that were correlated with global methylation ( $|r|$   
218             $>0.2$ ): age of blood collection and all cell types. Sex was additionally adjusted for in the  
219            Sex Combined analysis. Gestational age and birthweight met this cut-off in males, but not  
220            females, and were not corrected for because the effect of gestational age on DNA  
221            methylation has been found to mostly be due to nRBC proportion (29) and birthweight is  
222            largely dependent on gestational age. Sex chromosomes were included in Females Only  
223            and Males Only comparison but not the Sex Combined comparison. The sex of each  
224            sample was confirmed by the number of reads of sex chromosomes as previously  
225            described (16).

226  
227            Principal component analysis (**PCA**) was performed using smoothed methylation values  
228            over the DMRs identified in each comparison to test for separation of CHD and non-CHD  
229            samples. Data was standardized so each variable had a mean of 0 and standard deviation  
230            of 1, and principal components were selected by parallel analysis from 1000 permutations  
231            using GraphPad Prism v9.4.1. The two principal components that explained the greatest

232 variance in the data were selected for graphing and samples were color-coded by CHD  
233 and non-CHD. Sex specificity of the DMRs was tested by obtaining smoothed methylation  
234 values over DMRs from the Males Only comparison in female samples and over DMRs  
235 from the Females Only comparison in male samples, and PCA was performed as  
236 explained above.

237  
238 Machine learning algorithms implemented through DMRichR were used to identify  
239 minimal DMRs for classifying samples as CHD or non-CHD (16). Random forest  
240 algorithms from the Boruta package (30) and support vector machine algorithms from the  
241 sigFeature package (31) were used to build binary classification models and rank the  
242 DMRs by importance for the feature selection analyses. Minimal DMRs were selected as  
243 those that were identified in both lists and were in the top 1%.

244  
245 DS-CHD DMRs from Sex Combined, Females Only, and Males Only comparisons were  
246 overlapped by genomic coordinates using rtracklayer v1.54.0 (32) and GenomicRanges  
247 v1.46.1 (33), and the venn diagram was made with VennDiagram v1.7.3 (34) in R v4.1.3.

248

## 249 **2.7 Enrichment testing and gene ontology from WGBS DMRs**

250 DMRs from all comparisons were tested for enrichment in chromosome location  
251 compared to background regions using the Database for Annotation, Visualization and  
252 Integrated Discovery (DAVID), 2021 version (35,36). DMRs were tested for enrichment in  
253 genic (promoter, 5'UTR, exon, intron, 3'UTR, downstream, intergenic) and CpG (island,  
254 shore, shelf, open sea) contexts compared to background regions using DMRichR (16).  
255 The significance of genic and CpG annotations were tested using Fisher's exact test and  
256 FDR correction. DMRs were mapped to genes on the hg38 genome using TxDb. Gene

257 ontology enrichment was performed using rGREAT (37), with genomic coordinates of  
258 DMRs tested relative to background regions using the “oneClosest” rule.

259

## 260 **2.8 Replication of WGBS CHD DMRs in independent DS newborn study**

261 DMRs were tested for replication in a previously published DS NDBS WGBS dataset with  
262 10 non-CHD (2 female, 8 male) and 11 CHD (6 female, 5 male) individuals (16).  
263 Unadjusted smoothed methylation values were calculated in replication dataset samples  
264 over DMR genomic coordinates from Sex Combined, Females Only, and Males Only  
265 comparisons using the getMeth function of the bsseq R package (27). Unpaired t-tests  
266 were calculated using the smoothed methylation values for replication CHD vs non-CHD  
267 samples and  $p$ -values were corrected by FDR using GraphPad Prism v9.4.1.

268

## 269 **2.9 Comparison of WGBS CHD DMRs and background regions with DS vs TD NDBS** 270 **samples**

271 DS-CHD DMRs and background regions were tested for overlap with DMRs associated  
272 with DS in a previous epigenome-wide association study that included 21 DS (8 female,  
273 13 male) and 32 TD (16 female, 16 male) NDBS samples with WGBS data (16).  
274 Unadjusted smoothed methylation values were calculated in replication dataset samples  
275 over DMR and background region genomic coordinates from Sex Combined, Females  
276 Only, and Males Only analyses using the getMeth function of the bsseq R package (27).  
277 Unpaired t-tests were calculated for DS vs TD using the smoothed methylation values of  
278 the replication dataset and  $p$ -values were corrected by the FDR method using GraphPad  
279 Prism v9.4.1. Potential differences between the proportions of DS-CHD DMRs and  
280 background regions that were significantly differentially methylated in DS vs TD or  
281 methylated in the same direction in DS vs TD as DS-CHD vs DS non-CHD were calculated  
282 using the z-test for two population proportions.

283  
284  
285  
286  
287  
288  
289  
290  
291  
292  
293  
294  
295  
296  
297  
298  
299  
300  
301  
302  
303  
304  
305  
306  
307  
308

### 3. Results

#### 3.1 Sample traits were not different in DS-CHD cases compared to DS non-CHD controls

We quantitated DNA methylation by EPIC array and WGBS in DNA isolated from NDBS from 86 individuals with DS, 45 of whom also had a CHD. Overall, our cohort had more females ( $n = 54$ , CHD = 27, non-CHD = 27) than males ( $n = 32$ , CHD = 18, non-CHD = 14) and a high proportion of Hispanic participants ( $n = 57$  (63%)), compared to non-Hispanic white ( $n = 17$  (19.8%)), non-Hispanic Asian ( $n = 8$  (9.3%)), and non-Hispanic Black ( $n = 4$  (4.7%)) participants; however, there were no significant differences for sex or race/ethnicity between DS-CHD and DS non-CHD newborns (**Table 1**) (**Supplemental Table S3**). In addition, birthweight, gestational age, and age at blood collection did not differ significantly between DS-CHD and DS non-CHD newborns (**Table 1**) (**Supplemental Table S3**).

The estimated cell type proportions (CD8T, CD4T, NK, B cell, monocytes, granulocytes, nRBC) in newborn blood were highly variable across samples, particularly for nRBC and granulocyte proportions (**Supplemental Table S2**). All cell types were positively correlated with one another, except nRBCs which were negatively correlated with all other cell types (**Supplemental Table S4**) (**Supplemental Figure S1**). Most cell types (CD8T, CD4T, NK, monocytes, nRBC) were also significantly (unadjusted  $p < 0.05$ ) correlated with age of blood collection and all cell types were significantly correlated with WGBS global methylation levels, supporting the adjustment for cell types in our DMR analyses. Cell type proportions did not differ significantly between DS-CHD and DS non-CHD newborns overall, or in sex-stratified comparisons (**Table 1**) (**Supplemental Table S3**).

309  
310

**Table 1. Sample traits in DS-CHD cases and DS non-CHD controls**

|                                     | <b>All samples<br/>(n = 86)</b> | <b>DS-CHD<br/>(n = 45)</b>     | <b>DS non-CHD<br/>(n = 41)</b> |
|-------------------------------------|---------------------------------|--------------------------------|--------------------------------|
|                                     | <b>Mean or n<br/>(SD or %)</b>  | <b>Mean or n<br/>(SD or %)</b> | <b>Mean or n<br/>(SD or %)</b> |
| Global methylation                  | 79.3 (3.9)                      | 79.0 (4.3)                     | 79.5 (3.4)                     |
| CD8T                                | 0.05 (0.03)                     | 0.05 (0.03)                    | 0.05 (0.04)                    |
| CD4T                                | 0.12 (0.08)                     | 0.13 (0.09)                    | 0.11 (0.07)                    |
| NK                                  | 0.03 (0.02)                     | 0.03 (0.03)                    | 0.03 (0.02)                    |
| B cells                             | 0.007 (0.009)                   | 0.006 (0.009)                  | 0.007 (0.01)                   |
| Monocytes                           | 0.07 (0.04)                     | 0.07 (0.05)                    | 0.07 (0.04)                    |
| Granulocytes                        | 0.58 (0.21)                     | 0.54 (0.23)                    | 0.63 (0.17)                    |
| nRBCs                               | 0.12 (0.23)                     | 0.15 (0.27)                    | 0.09 (0.19)                    |
| Birthweight (grams) <sup>1</sup>    | 3018 (633)                      | 2953 (636)                     | 3092 (630)                     |
| Gestational age (days) <sup>2</sup> | 266 (17)                        | 266 (16)                       | 267 (18)                       |
| Age of blood collection (hours)     | 62 (57)                         | 63 (49)                        | 62 (65)                        |
| Sex                                 |                                 |                                |                                |
| Female                              | 54 (62.8%)                      | 27 (60%)                       | 27 (65.9%)                     |
| Male                                | 32 (37.2%)                      | 18 (40%)                       | 14 (34.1%)                     |
| Race/ethnicity                      |                                 |                                |                                |
| Asian (non-Hispanic)                | 8 (9.3%)                        | 6 (13.3%)                      | 2 (4.9%)                       |
| Black (non-Hispanic)                | 4 (4.7%)                        | 3 (6.7%)                       | 1 (2.4%)                       |
| White (non-Hispanic)                | 17 (19.8%)                      | 9 (20%)                        | 8 (19.5%)                      |
| Hispanic                            | 57 (66.3%)                      | 27 (60%)                       | 30 (73.2%)                     |

311  
312  
313  
314

<sup>1</sup> Missing data from 1 sample (DS non-CHD)

<sup>2</sup> Missing data from 5 samples (4 DS-CHD, 1 DS non-CHD)

315 **3.2 WGBS of newborn blood DNA detects global hypomethylation in DS-CHD males**  
316 **compared to DS non-CHD males due to elevated nRBC proportions**

317 To assess the reproducibility of EPIC array and WGBS methylation quantitation, we  
318 examined global CpG methylation levels from the two platforms and found that EPIC array  
319 beta values (**Supplemental Table S5**) were lower than WGBS global methylation values  
320 across all samples, but very strongly correlated ( $r = 0.9716$ ,  $p < 0.0001$ ) (**Supplemental**  
321 **Figure S2**). While a few samples had notably low global CpG methylation levels (<70%  
322 from WGBS), these samples were not removed from analysis because their other QC  
323 metrics were acceptable and their corresponding array beta values were also low,  
324 suggesting it was not a technical error.

325  
326 Using WGBS data, we first assessed whether global CpG methylation levels differed  
327 between DS-CHD and DS non-CHD newborns. There was no significant difference  
328 overall, but when stratified by sex we found significant hypomethylation in DS-CHD males  
329 compared with DS non-CHD males (unadjusted  $p < 0.05$ ), a pattern that was not seen in  
330 females (**Figure 1A-B**) (**Supplemental Figure S3**) (**Supplemental Table S3**). We  
331 confirmed by logistic regression that global methylation was the most predictive variable  
332 of CHD in males ( $p = 0.101$ ), while CD4T cell proportion was the most predictive variable  
333 in females ( $p = 0.0681$ ) (**Supplemental Table S6**). Because nRBCs are known to have  
334 lower methylation levels than other cell types in blood (38) and their proportion in blood  
335 samples varies widely across individuals (39) in negative association with global  
336 methylation (38,40), we investigated the relationship between nRBC proportion and global  
337 methylation in our samples. In both females and males, nRBC proportion was significantly  
338 negatively correlated with global methylation levels (**Figure 1C-D**) (**Supplemental Table**  
339 **S4**) (**Supplemental Figure S1**) and was the most predictive variable of global methylation  
340 in linear regression models (females  $p < 2E-16$ , males  $p = 2.12E-9$ ) (**Supplemental Table**  
341 **S6**). Presence of CHD predicted global methylation levels in males ( $p = 0.0618$ ) much  
342 better than in females ( $p = 0.981$ ), but addition of nRBC proportion as an adjustment  
343 covariate decreased the strength of this relationship (males,  $p = 0.237$ ) (**Supplemental**  
344 **Table S6**).

345  
346 While proportion of nRBCs in the nucleated cell population is typically very low, with a  
347 median of 0 for the estimated nRBC proportions across samples in our study, we identified  
348 12 out of 32 male samples with nRBC proportions  $> 1\%$ , of which 10 (83%) had a CHD  
349 (**Supplemental Table S2**) (**Supplemental Figure S3**). In contrast, we identified 24/54  
350 females with nRBC proportions  $> 1\%$  of which only 50% ( $n=12$ ) had a CHD. In a sensitivity

351 analysis, we removed five male samples that had notably high nRBC levels (>20%) and  
352 corresponding low global methylation levels and saw that global methylation in DS-CHD  
353 vs DS non-CHD male samples were no longer significantly different ( $p = 0.1865$ )  
354 (**Supplemental Table S3**). Females showed high interindividual variation in global  
355 methylation levels and nRBC proportions in both CHD and non-CHD groups, while CHD  
356 males showed much more variation (similar to females) than non-CHD males  
357 (**Supplemental Figure S3**).  
358

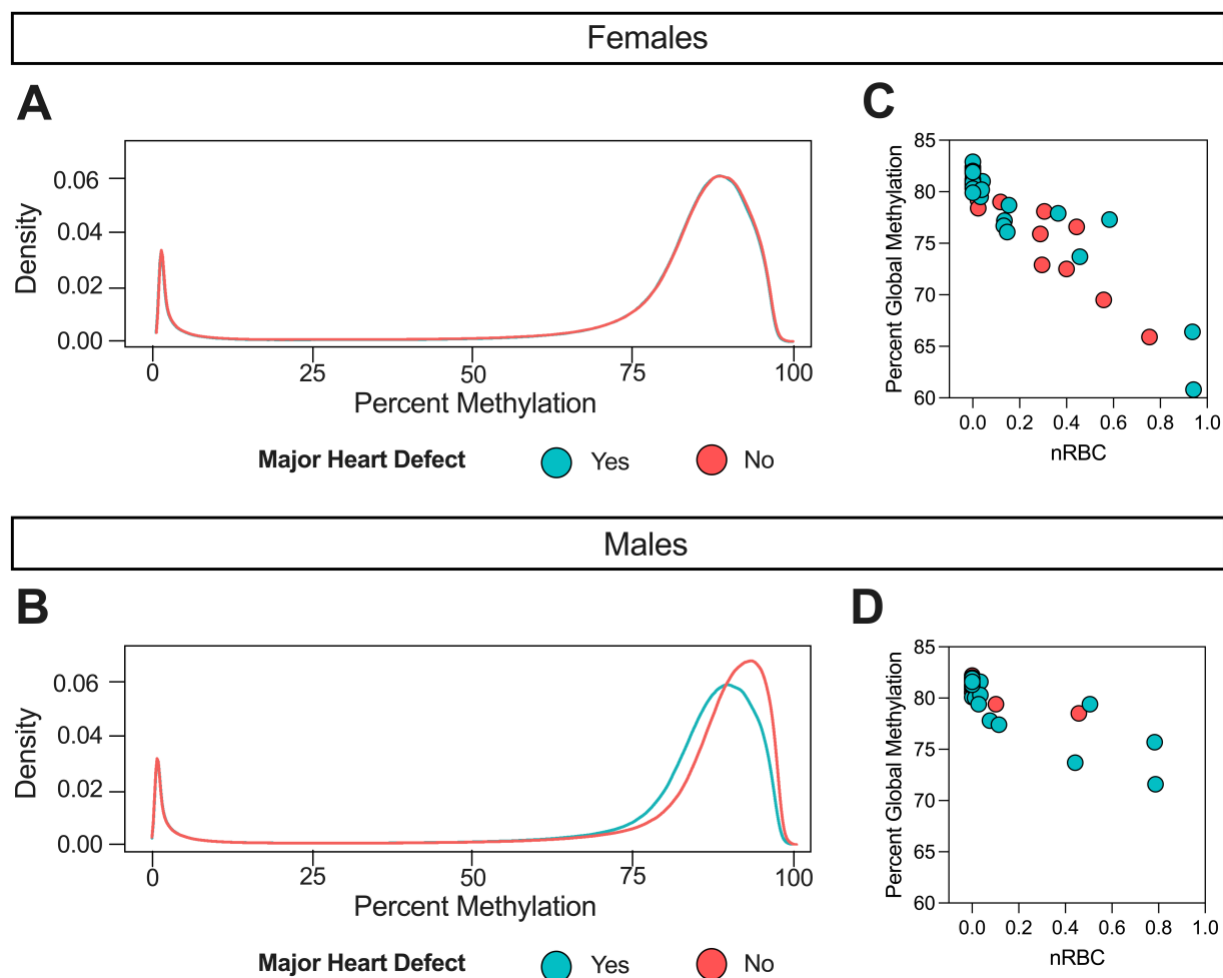

359  
360 **Figure 1. Global hypomethylation in DS-CHD males vs DS non-CHD males is driven by**  
361 **samples with high nRBC proportions.** Density plot of average percent smoothed  
362 methylation in DS-CHD (Yes: blue) and DS non-CHD (No: red) in **A**) females (note that red  
363 and blue lines are overlapping) and **B**) males. Percent global methylation correlated with

364 nRBC proportion in **C**) females (Pearson's  $r = -0.93$ ,  $p = 2.16E-24$ ) and **D**) males (Pearson's  
365  $r = -0.84$ ,  $p = 2.13E-9$ )  
366

### 367 **3.3 Sex-stratified DMRs distinguish DS-CHD from DS non-CHD samples better than** 368 **sex-combined DMRs**

369 Next, using WGBS data we investigated whether there were DMRs associated with DS-  
370 CHDs in Sex Combined, Females Only, and Males Only comparison groups to  
371 characterize both sex-specific and sex-independent patterns in DS-CHD methylation. We  
372 adjusted for confounding variables that were associated with global methylation ( $|r| > 0.2$ ):  
373 age of blood collection and all cell type proportions, as well as sex (specific for the Sex  
374 Combined comparison) (**Supplemental Figure S2**) (**Supplemental Table S4**).

375  
376 The Sex Combined comparison yielded 58 significant by permutation ( $p < 0.05$ ) DMRs  
377 (**Supplemental Table S7**). In Females Only, we found 341 DMRs (**Supplemental Table**  
378 **S8**), whereas in Males Only we found 3,938 DMRs (**Figure 2A**) (**Supplemental Table**  
379 **S9**). Samples with low methylation levels across Males Only DMRs corresponded with  
380 those with low global methylation. In a sensitivity analysis excluding the five male samples  
381 with nRBC proportions  $> 20\%$ , we identified 2,474 Males Only DMRs (**Supplemental**  
382 **Table S10**).

383  
384 DMR hierarchal clustering and principal component analysis (**PCA**) showed that CHD and  
385 non-CHD samples did not separate completely, although sex stratification improved the  
386 distinction (**Figure 2A-B**). Using machine learning feature selection, we identified a  
387 minimal set of 19 Males Only DMRs that could distinguish CHD from non-CHD samples  
388 (**Figure 2C**) (**Supplemental Table S11**). The five male samples with high nRBCs and low  
389 methylation across DMRs did not have outlier methylation values across the 19 minimal  
390 DMRs, showing that the most predictive DMRs were not driven by outliers. In the Males



391 Only sensitivity analysis (with 5 samples with nRBC >20% removed), 13 minimal DMRs  
392 distinguished CHD from non-CHD, with four overlapping with those from the Males Only  
393 minimal selection using all samples: *DCAF1*, *LARGE2*, *LOC105379273*, *SYT9*  
394 **(Supplemental Table S11)**. In the other comparisons, 6 Sex Combined and 3 Females  
395 Only DMRs were identified by the feature selection but could not cleanly distinguish CHD  
396 from non-CHD samples **(Supplemental Figure S4) (Supplemental Table S11)**.

397  
398 In the replication dataset of WGBS from NDBS of 21 children with DS, 11 with CHD (6  
399 females, 5 males) and 10 without CHD (2 females, 8 males) (16), we found 26 (46.4%) of  
400 the 56 Sex Combined DMRs that were covered in the replication study were methylated  
401 in the same direction in both groups **(Supplemental Table S12)**, while 161/329 (48.9%)  
402 of Females Only **(Supplemental Table S13)** and 2,229/3,938 (56.7%) of Males Only  
403 DMRs **(Supplemental Table S14)** were methylated in the same direction. Few DMRs  
404 were significantly differentially methylated (unadjusted  $p < 0.05$ ) in the replication dataset,  
405 with 2 Sex Combined, 9 Females Only, and 68 Males Only meeting this cutoff.

406  
407 In DMR analysis using EPIC array data, there were no significant DMRs associated with  
408 DS-CHDs, likely due to the EPIC array only covering ~3% of CpGs covered by WGBS  
409 (data not shown).

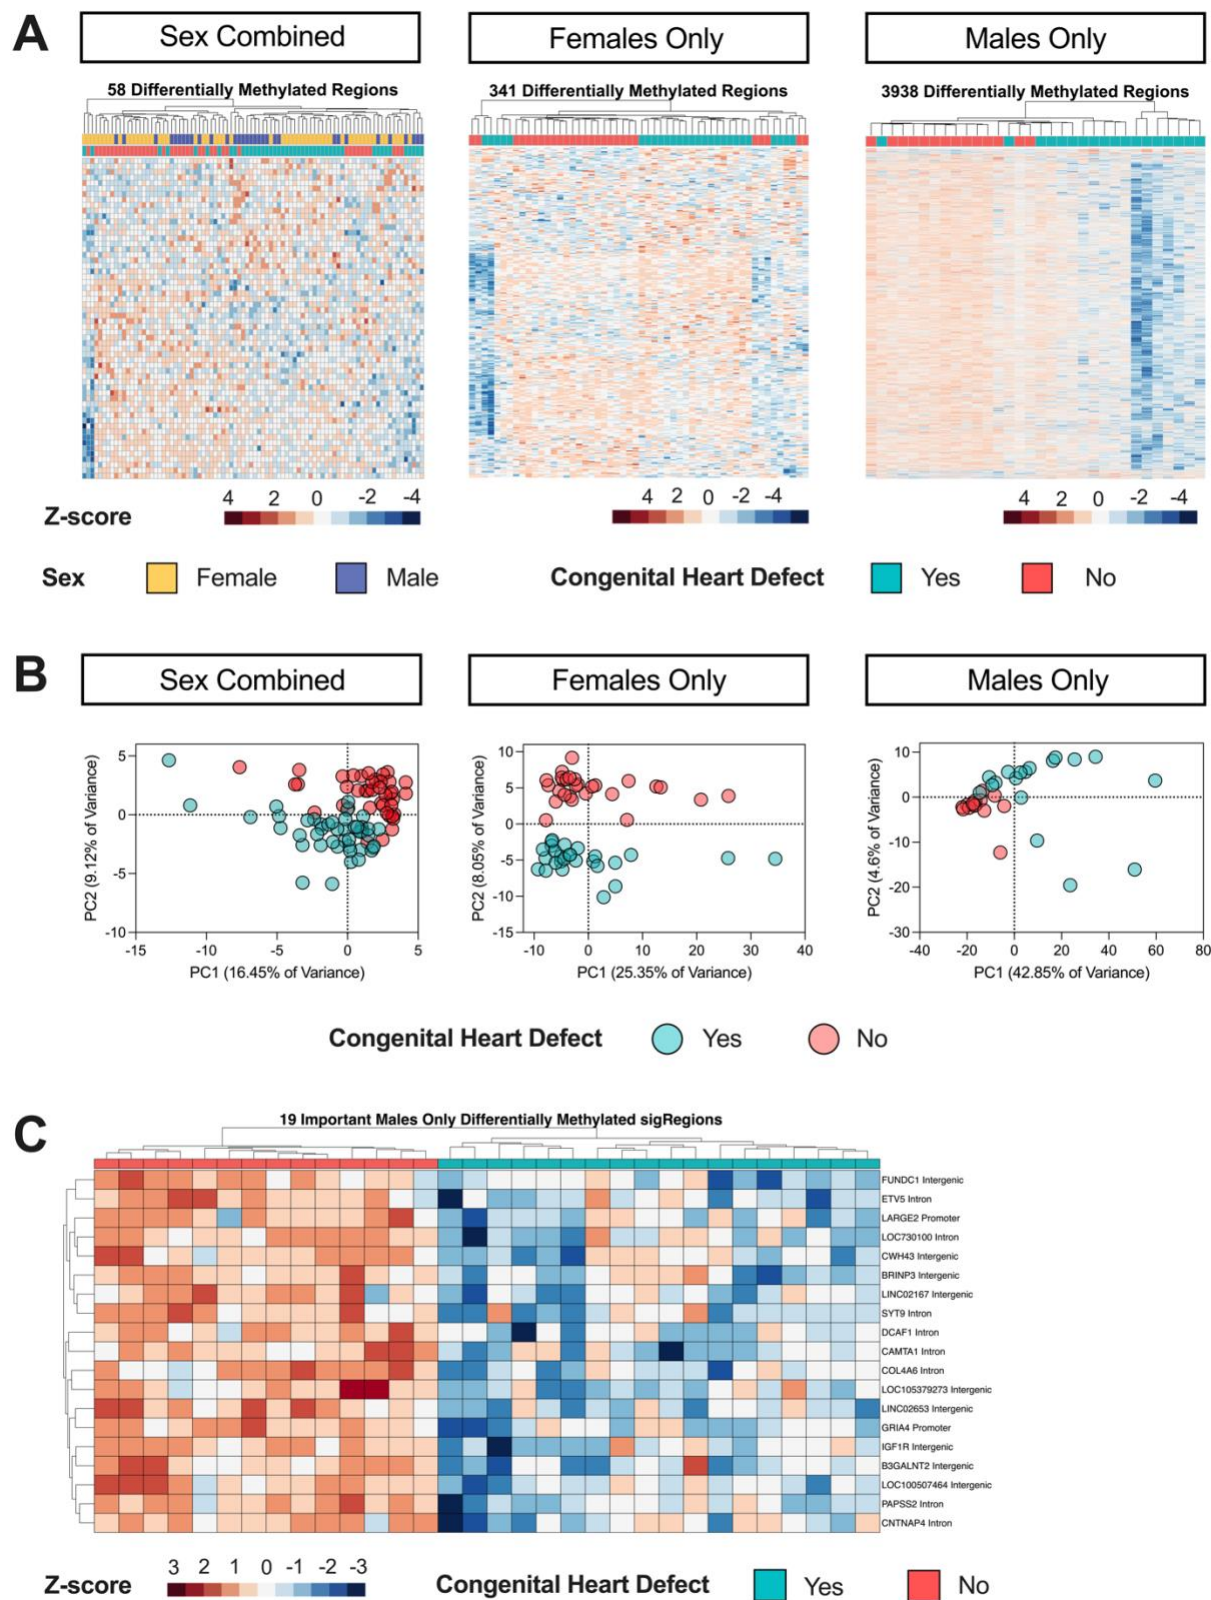

410

411

412

**Figure 2. DMR profiles of CHD vs non-CHD in Sex Combined, Females Only, and Males Only comparisons within DS. A) Heatmaps of nominally significant ( $p < 0.05$ ) DMRs**

413 from DS-CHD vs DS non-CHD samples in Sex Combined, Females Only, and Males Only  
414 comparisons. All heatmaps show hierarchical clustering of Z-scores, which are the number  
415 of standard deviations from the mean of non-adjusted percent smoothed individual  
416 methylation values for each DMR. **B)** PCA analysis using the smoothed methylation values  
417 of all DMRs from the Sex Combined and Females Only comparisons and the 1000 most  
418 significant DMRs in the Males Only comparison. **C)** Hierarchical clustering heatmap of the  
419 machine learning feature selection analysis of the consensus DMRs from the Males Only  
420 comparison.  
421

### 422 **3.4 DS-CHD DMRs are sex-specific, with a small fraction overlapping across sexes**

423 We next examined similarities and differences in DMRs across females and males. In the  
424 Sex Combined comparison, 60% of DMRs were hypomethylated in CHD compared to  
425 non-CHD samples, while 40% of Females Only DMRs and 96% of Males Only DMRs were  
426 hypomethylated (**Figure 3A**). In our Males Only sensitivity analysis that removed samples  
427 with nRBC proportions >20%, 82% of DMRs were hypomethylated. To test the sex  
428 specificity of Females Only and Males Only DMRs, we analyzed the smoothed methylation  
429 values over DMRs from the Males Only comparison in female samples and from the  
430 Females Only comparison in male samples and found that CHD and non-CHD samples  
431 did not separate by PCA (**Supplemental Figure S5**). Females and males also did not  
432 separate by hierarchal clustering or PCA in the Sex Combined comparison (**Figure 2A**)  
433 (**Supplemental Figure S6**).

434  
435 DMR genomic coordinates from all comparisons were then overlapped to identify sex-  
436 specific vs sex-independent regions. Only 4 DMRs overlapped across all three  
437 comparisons, 22 across Sex Combined and Females Only comparisons, 10 across Sex  
438 Combined and Males Only comparisons, and 4 across Males Only and Females Only  
439 comparisons (**Figure 3B**). All overlapping DMRs between comparison groups were  
440 methylated in the same direction except for the 4 overlapping between Females Only and  
441 Males Only comparisons (but not the Sex Combined comparison), which showed

442 methylation in opposite directions (**Figure 3C**). The 4 DMRs identified in all three  
 443 comparisons mapped to *CDH22*, *ZNF890P*, *DIRC3*, and *TLL10-AS1* genes.

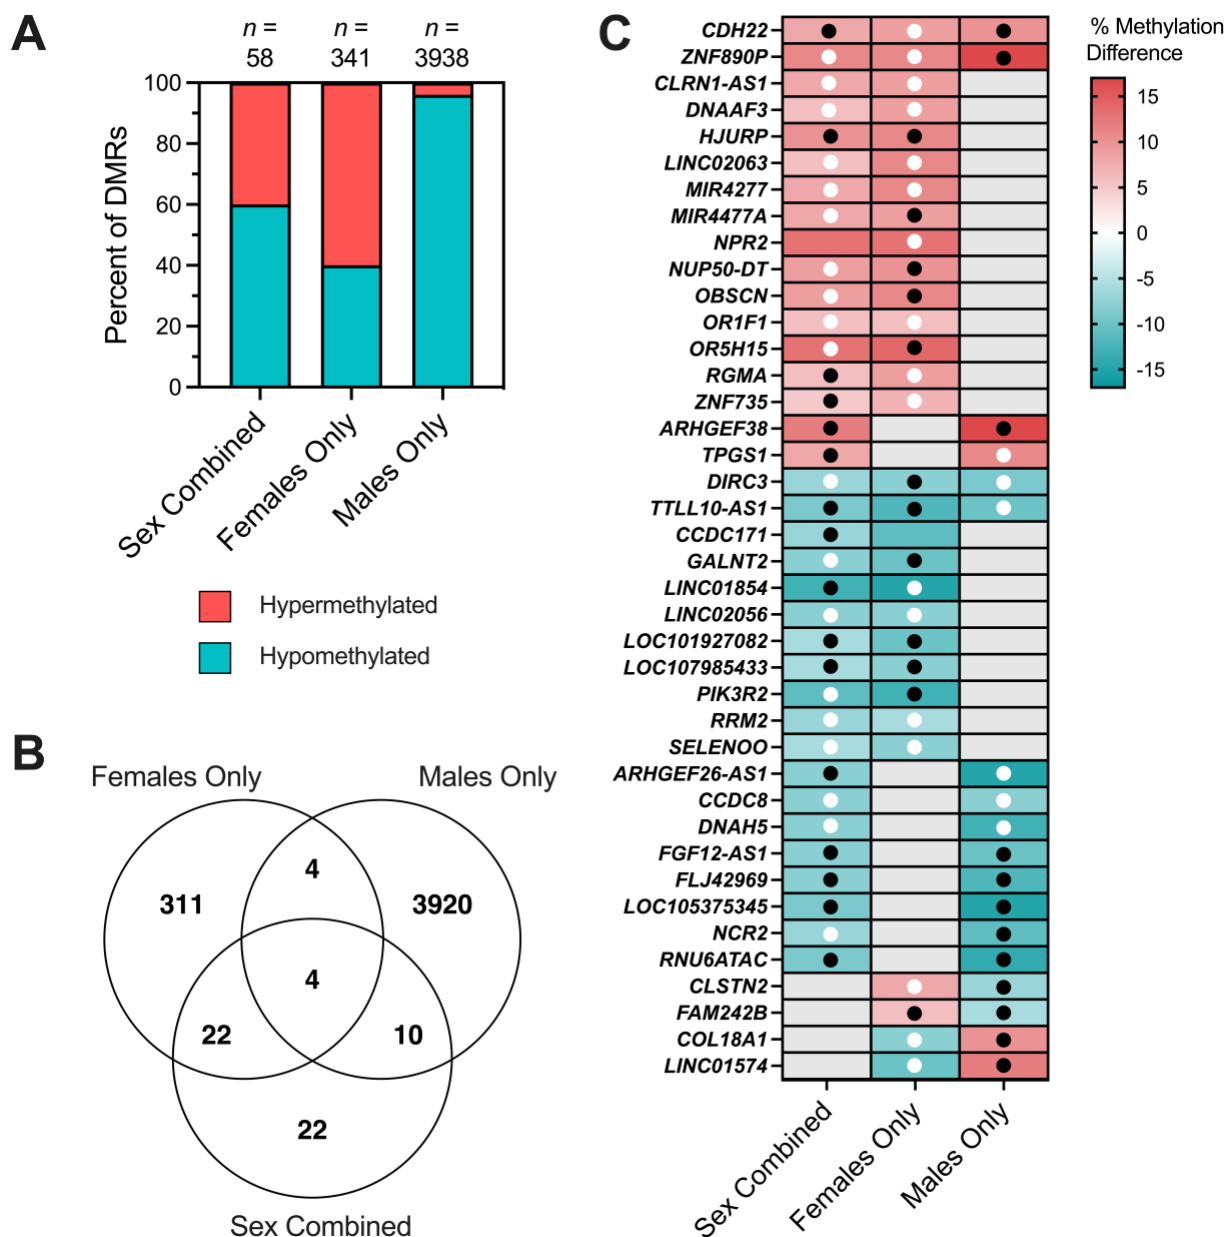

444

445 **Figure 3. Overlapping CHD DMRs across Sex Combined, Female Only, and Male Only**  
 446 **comparisons within DS. A)** The percent of DMRs which were hypermethylated versus  
 447 hypomethylated in each of the three comparisons. **B)** Venn diagram reflecting the numbers  
 448 of unique and overlapping DMR genomic coordinates across the three comparisons. **C)** DS-  
 449 CHD DMRs which overlap in two or more comparisons mapped to genes. Red indicates  
 450 hypermethylation in CHD compared to non-CHD while blue represents hypomethylation,  
 451 with stronger shades representing a greater percent methylation difference. Grey is used  
 452 when a DMR was not called for that comparison. Black dots indicate methylation in the

453 same direction in the discovery and replication datasets (10 non-CHD (2 female, 8 male)  
454 and 11 CHD (6 female, 5 male)) while white dots indicate methylation in the opposite  
455 direction in the two datasets. No dot means that the DMR genomic coordinates were not  
456 covered in the replication dataset.  
457

### 458 **3.5 DS-CHD DMRs are enriched for gene exons, CpG islands, and bivalent chromatin**

459 CHD DMRs from Sex Combined, Females Only, and Males Only comparisons were  
460 analyzed for enrichment compared to background regions by distribution across  
461 chromosomes, genic and CpG contexts, histone marks, and chromatin states. In all three  
462 comparisons, DMRs were distributed throughout the genome (**Supplemental Figure S7**),  
463 though Males Only DMRs showed significant enrichment (FDR <0.05) on chromosomes  
464 2, 4, 5, 8, 18, and 21, while Females Only DMRs showed nominal enrichment (unadjusted  
465  $p < 0.05$ ) on chromosomes 20, X, and 21 (**Supplemental Table S15**). There was  
466 significant positive enrichment in all comparisons for gene exons and CpG islands (**Figure**  
467 **4**) (**Supplemental Figures S8, S9**) (**Supplemental Table S16**), as well as the  
468 transcriptionally repressive H3K27me3 histone mark and bivalent enhancers and  
469 transcription start sites based on chromatin states (**Supplemental Figures S10-S15**). Sex  
470 differences were also observed, with significant positive enrichment for CpG shelves in  
471 the Females Only comparison and significant negative enrichment in the Males Only  
472 comparison. The Females Only DMRs also showed enrichment for H3K4me3, associated  
473 with active/poised chromatin, while the Males Only DMRs showed enrichment for  
474 H3K9me3, another repressive mark (**Supplemental Figure S13**). Hypomethylated  
475 regions showed overall stronger enrichment for histone marks and chromatin states  
476 compared to hypermethylated regions (**Supplemental Figures S14-S15**).

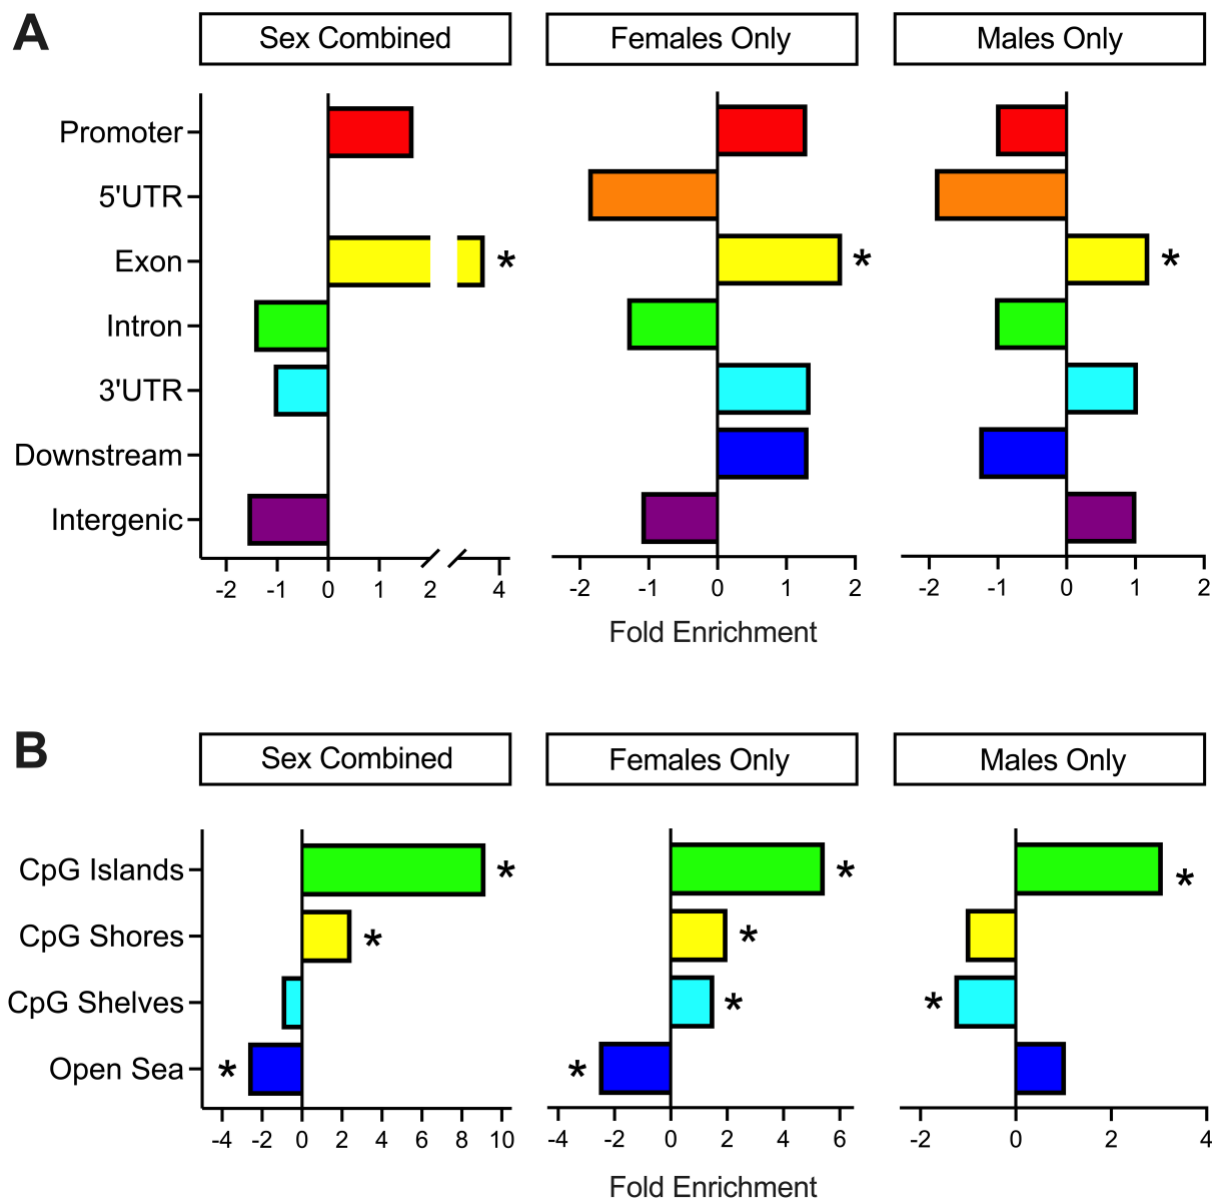

477

478 **Figure 4. Annotation enrichments of CHD DMRs. A)** Genic and **B)** CpG enrichments of  
 479 all significant ( $p < 0.05$ ) DMRs from Sex Combined, Females Only, and Males Only  
 480 comparisons. DMRs were compared to background regions for each comparison and  
 481 significance was determined by the Fisher's test and FDR correction. \* =  $q < 0.05$ .  
 482

### 483 3.6 DS-CHD DMRs map to genes that are enriched for cardiac terms

484 DMRs mapped to genes were analyzed for enrichment across Gene Ontology terms ( $p$   
 485  $< 0.05$ ) related to biological processes, cellular components, and molecular functions. All  
 486 comparisons showed enrichment for heart-related terms, such as cardiac muscle

487 contraction (Sex Combined) (**Figure 5**), dorsal/ventral pattern formation, which includes  
488 formation of the embryonic heart tube (Females Only), and development of the septum  
489 primum, which divides the heart atrium into left and right and whose developmental failure  
490 can lead to AVSD (Males Only) (**Supplemental Figure S16**) (**Supplemental Tables S17-**  
491 **S19**). Genes contributing to the heart-related terms included *FGF12*, *PIK3CA*, *TNNI3*,  
492 *PDE4D*, *ACVR1*, *GATA4*, and others (**Table 2**). Enriched terms also included immune-  
493 related biological processes, such as platelet activation and innate immune response (Sex  
494 Combined) (**Figure 5**).

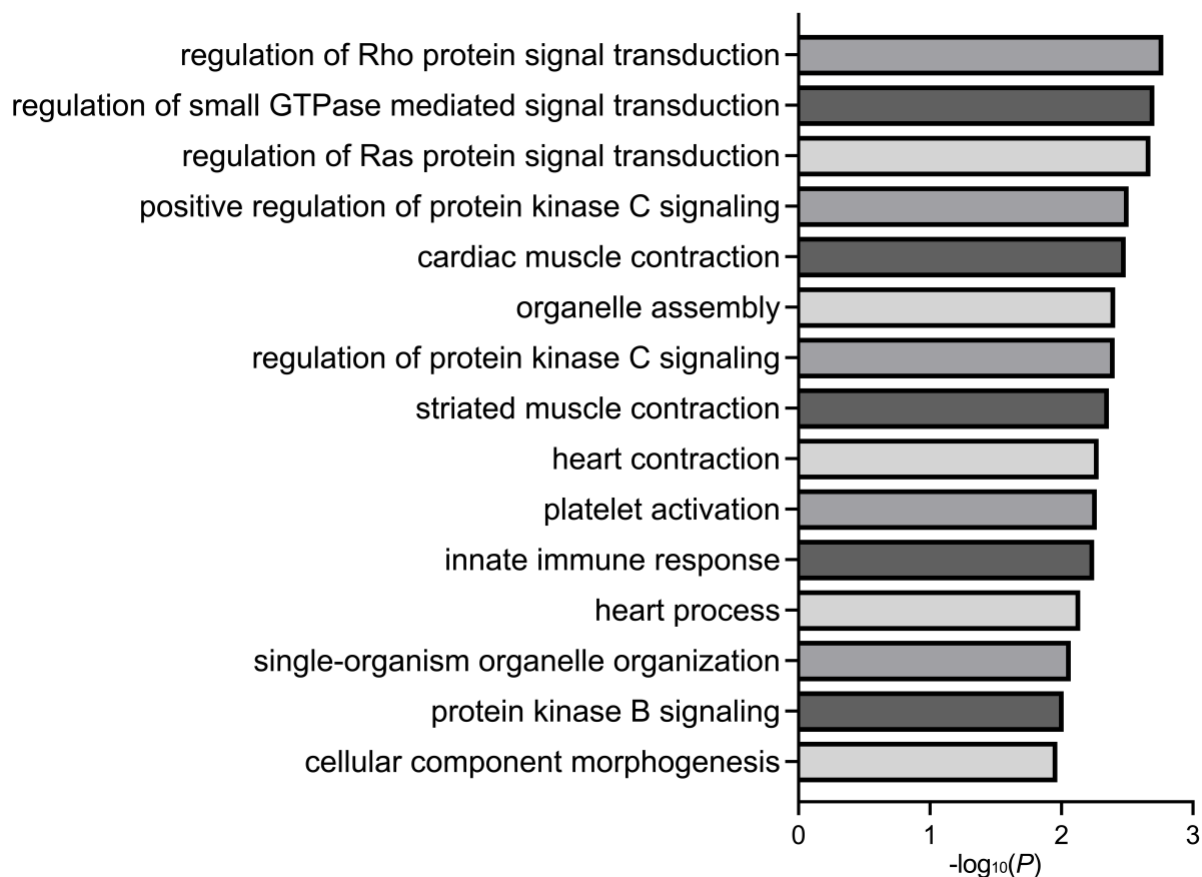

495  
496 **Figure 5. Gene ontology enrichments.** Bar plot of the fifteen most significant GO  
497 enrichments for biological processes in DS-CHD versus DS non-CHD DMRs from the Sex  
498 Combined comparison.  
499

500 **Table 2. Heart-related biological processes identified from DMR Gene Ontology**

| <b>Comparison</b> | <b>GO Term</b>                                                        | <b>Genes</b>                                                         |
|-------------------|-----------------------------------------------------------------------|----------------------------------------------------------------------|
| Sex Combined      | cardiac muscle contraction                                            | <i>FGF12,PIK3CA,TNNI3</i>                                            |
|                   | striated muscle contraction                                           | <i>FGF12,PIK3CA,TNNI3</i>                                            |
|                   | heart contraction                                                     | <i>FGF12,PIK3CA,TNNI3</i>                                            |
|                   | heart process                                                         | <i>FGF12,PIK3CA,TNNI3</i>                                            |
|                   | ductus arteriosus closure                                             | <i>TFAP2B</i>                                                        |
|                   | determination of dorsal/ventral asymmetry                             | <i>NBL1</i>                                                          |
|                   | cellular response to erythropoietin                                   | <i>CD40</i>                                                          |
|                   | regulation of cardiac conduction                                      | <i>NPR2,TNNI3</i>                                                    |
|                   | muscle contraction                                                    | <i>FGF12,PIK3CA,TNNI3</i>                                            |
|                   | skeletal muscle contraction                                           | <i>TNNI3</i>                                                         |
| Females Only      | dorsal/ventral pattern formation                                      | <i>FOXP1,GLI2,GREM2,INTU,MDFI,SMAD6,SUFU,TCTN1</i>                   |
|                   | negative regulation of relaxation of cardiac muscle                   | <i>PDE4D</i>                                                         |
|                   | negative regulation of heart contraction                              | <i>AGTR2,PDE4D</i>                                                   |
|                   | adrenergic receptor signaling pathway involved in heart process       | <i>PDE4D</i>                                                         |
|                   | regulation of heart rate by chemical signal                           | <i>PDE4D</i>                                                         |
|                   | regulation of relaxation of cardiac muscle                            | <i>PDE4D</i>                                                         |
|                   | aorta development                                                     | <i>SMAD6,SUFU,TFAP2B,TGFB2</i>                                       |
|                   | regulation of ventricular cardiac muscle cell membrane repolarization | <i>ANK2,WDR1</i>                                                     |
| Males Only        | septum primum development                                             | <i>ACVR1,GATA4,GJA5,SOX4,TGFB2</i>                                   |
|                   | atrial septum primum morphogenesis                                    | <i>ACVR1,GATA4,SOX4,TGFB2</i>                                        |
|                   | atrioventricular canal development                                    | <i>CHD7,FOXP4,HAS2,PTPN11</i>                                        |
|                   | adult heart development                                               | <i>ADRA1A,CHD7,HAND2,SCUBE1,TCAP</i>                                 |
|                   | artery smooth muscle contraction                                      | <i>AGT,EDN1,EDN2,HTR2A,MKKS</i>                                      |
|                   | right ventricular compact myocardium morphogenesis                    | <i>CHD7</i>                                                          |
|                   | atrial septum secundum morphogenesis                                  | <i>GATA4</i>                                                         |
|                   | positive regulation of heart rate                                     | <i>ADRA1A,ADRB1,EDN1,EDN2,EDN3,KCNQ1,PDE4D,RYR2,SCN3B,TACR3,UTS2</i> |



|                                          |                                                                                                                                                                                             |
|------------------------------------------|---------------------------------------------------------------------------------------------------------------------------------------------------------------------------------------------|
| cardiac muscle hypertrophy               | <i>AGT, GATA4, GATA6, HDAC4, KDM4A, LEP, PP3CA, RYR2, TCAP, TIAM1, TTN</i>                                                                                                                  |
| positive regulation of heart contraction | <i>ADRA1A, ADRB1, EDN1, EDN2, EDN3, KCNQ1, PDE4D, RGS2, RYR2, SCN3B, TACR3, TGFB2, UTS2</i>                                                                                                 |
| septum secundum development              | <i>GATA4</i>                                                                                                                                                                                |
| cardiac septum morphogenesis             | <i>ACVR1, BMP4, BMP7, CHD7, FZD1, FZD2, GATA4, GATA6, GJA5, HES1, HEY1, HEYL, ISL1, JAG1, MSX2, NRP1, PARVA, PITX2, PROX1, RARB, SMAD6, SMAD7, SOX11, SOX4, TBX3, TGF B2, TGFBR2, ZFPM2</i> |

501

### 502 3.7 DS-CHD DMRs are also differentially methylated in DS vs typical development

#### 503 NDBS

504 DS-CHD DMRs were tested for comparison in previously published DS vs TD NDBS  
505 WGBS samples (16) to evaluate the hypothesis that if DS-CHD is a more severe form of  
506 DS, CHD DMRs should be partially shared with DS vs TD DMRs (**Table 3**). Of the 58 Sex  
507 Combined CHD DMRs, 16 (27.6%) were significantly differentially methylated ( $p < 0.05$ ) in  
508 DS vs TD samples (**Supplemental Table S20**), 9 of which (56.3%) were methylated in  
509 the same direction in DS vs TD samples as DS-CHD vs DS non-CHD samples. Of  
510 Females Only DMRs, 42/341 (12.3%) were significantly differentially methylated ( $p < 0.05$ )  
511 in DS vs TD, with 28 (66.7%) methylated in the same direction (**Supplemental Table S21**)  
512 and of Males Only DMRs, 602/3,938 (15.3%) were significantly differentially methylated  
513 ( $p < 0.05$ ) in DS vs TD, with 528 (87.7%) methylated in the same direction (**Supplemental**  
514 **Table S22**). These numbers decreased in a sensitivity analysis with the Males Only DMRs  
515 generated with five samples with nRBC  $> 0.2$  removed, where 334/2,454 (13.6%) covered  
516 DMRs were significantly ( $p < 0.05$ ) differentially methylated in DS vs TD male samples, of  
517 which 248/334 (74.3%) were methylated in the same direction. For all three comparisons,  
518 there was a trend towards more CHD DMRs being significantly differentially methylated in  
519 DS vs TD samples compared to background regions (z-test for two population proportions,  
520 Sex Combined  $p = 0.08364$ , Females Only  $p = 0.0536$ , Males Only  $p = 0.0601$ ) (**Figure 6A**).

521 In Males Only, significantly more DMRs were methylated in the same direction in DS vs  
 522 TD as DS-CHD vs DS non-CHD compared to background regions (z-test for two  
 523 population proportions,  $p < 0.00001$ ), though this was not true for Sex Combined or  
 524 Females Only CHD DMRs (**Figure 6B**). Of DMRs that were significantly differentially  
 525 methylated ( $q < 0.05$ ) in DS vs TD samples, 5/9 (55.6%) Sex Combined, 6/8 (75%)  
 526 Females Only, and 15/16 (93.85%) Males Only DMRs were hypomethylated in DS  
 527 compared to TD samples. With the exception of an exon in *ZNF735*, which was  
 528 significantly hypermethylated ( $q < 0.05$ ) in both the Sex Combined and Females Only DS  
 529 vs TD comparisons, all DMRs were specific to one comparison (**Figure 6C**).

530

531 **Table 3. Significance and direction of CHD DMRs and background regions in DS vs**  
 532 **TD samples**  
 533

|                     | <b>DMRs</b>  | <b>Background Regions</b> |
|---------------------|--------------|---------------------------|
| <b>Sex Combined</b> | <i>n</i> (%) | <i>n</i> (%)              |
| Total               | 58           | 5,363                     |
| Omitted             | 0            | 28                        |
| $p < 0.05$          | 16 (27.6)    | 995 (18.7)                |
| $p \geq 0.05$       | 42 (72.4)    | 4,340 (81.3)              |
| Same direction      | 34 (58.6)    | 3,274 (61.4)              |
| Opposite direction  | 24 (41.4)    | 2,061 (38.6)              |
| <b>Females Only</b> | <i>n</i> (%) | <i>n</i> (%)              |
| Total               | 341          | 11,998                    |
| Omitted             | 2            | 147                       |
| $p < 0.05$          | 42 (12.4)    | 1,101 (9.3)               |
| $p \geq 0.05$       | 297 (87.6)   | 10,750 (90.7)             |
| Same direction      | 172 (50.7)   | 6,304 (53.2)              |
| Opposite direction  | 167 (49.3)   | 5,547 (46.8)              |
| <b>Males Only</b>   | <i>n</i> (%) | <i>n</i> (%)              |
| Total               | 3,938        | 127,819                   |
| Omitted             | 26           | 1,413                     |
| $p < 0.05$          | 602 (15.4)   | 18,099 (14.3)             |
| $p \geq 0.05$       | 3,310 (84.6) | 108,307 (85.7)            |
| Same direction      | 3,001 (76.7) | 90,954 (72.0)             |
| Opposite direction  | 911 (23.3)   | 35,452 (28.0)             |

534

535 Same direction indicates methylation is in same direction (hypo or hyper) in DS vs TD as in  
 536 DS-CHD vs non-CHD

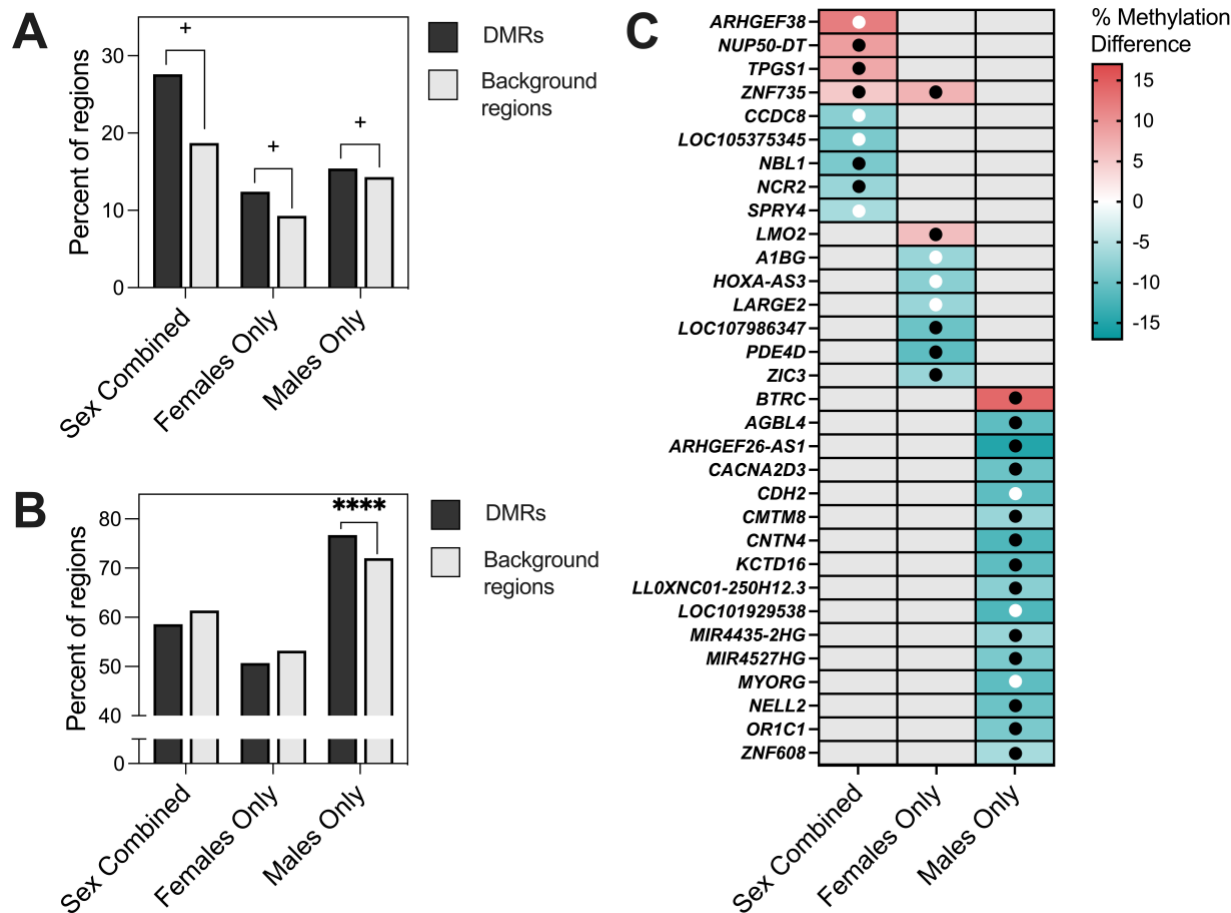

537

538 **Figure 6. Comparison of DS-CHD DMRs with DS vs TD samples. A)** Percent of DS-CHD  
539 DMRs and background regions that were significantly differentially methylated in DS vs TD  
540 samples. Z-test for two population proportions, Sex Combined ( $z = 1.7343$ , two-tailed  $p =$   
541  $0.08364$ ) Females Only ( $z = 1.93$ , two-tailed  $p = 0.0536$ ), Males Only ( $z = 1.8808$ , two-tailed  $p$   
542  $= 0.0601$ ).  $+ = p < 0.1$ . **B)** Percent of DS-CHD DMRs that were methylated in same direction  
543 in DS vs TD as in DS-CHD vs DS non-CHD. Z-test for two populations proportions, Sex  
544 Combined ( $z = -0.4274$ , two-tailed  $p = 0.6672$ ), Females Only ( $z = -0.8936$ , two-tailed  $p$   
545  $= 0.37346$ ), Males Only ( $z = 6.5357$ , two-tailed  $p < 0.00001$ ).  $**** = p < 0.00001$ . **C)** Heatmap  
546 showing DS-CHD DMRs that were significant ( $q < 0.05$ ) in DS vs TD samples mapped to  
547 genes. Red indicates hypermethylation in CHD compared to non-CHD while blue represents  
548 hypomethylation, with stronger shades representing a greater percent methylation difference  
549 and gray meaning that that DMR was not significant for that comparison. Black dots indicate  
550 that methylation is in the same direction for DS vs TD as DS-CHD vs DS non-CHD while  
551 white dots indicate methylation is in the opposite direction.  
552

#### 553 4. Discussion

554 This is the largest study to date to investigate epigenetic variation associated with CHDs in  
555 individuals with DS. Although non-syndromic CHDs have been widely studied, there has been

556 relatively little research into the etiology and biomarkers of CHDs in individuals with DS,  
557 despite nearly half of the DS population presenting this phenotype (2–5). To address this gap,  
558 we assessed DS-CHD methylation in DNA isolated from NDBSs, an understudied and  
559 accessible biospecimen that enables the analysis of epigenomic changes during the *in utero*  
560 and perinatal periods that are associated with phenotypic traits of interest. We confirmed the  
561 reproducibility of DNA extraction and bisulfite conversion from NDBSs by finding a high  
562 correlation ( $r = 0.9716$ ) between global methylation levels from WGBS and EPIC array, which  
563 used different punches from the same blood spots.

564  
565 Although newborn blood typically shows ~79-84% global CpG methylation from WGBS  
566 (16,40), we found a range of 60.8-82.9% in our NDBS DNA. The samples with notably low  
567 WGBS global methylation also had low EPIC array beta values and passed other QC metrics,  
568 indicating that technical errors do not explain the result, although we cannot exclude non-  
569 biological causes. Previous studies have found a trend towards global hypomethylation in DS  
570 compared to TD NDBS (16), which may explain our findings. We further found that global  
571 methylation was lower in DS-CHD males compared to DS non-CHD males, though this  
572 relationship was not found in females. Global methylation was strongly negatively correlated  
573 with, and predicted by, nRBC proportion in both sexes. Although nRBCs typically constitute a  
574 very small proportion of nucleated cells, we found nRBC proportions ranged widely in both  
575 sexes and were evenly spread amongst CHD and non-CHD females but in males, 10/12  
576 samples with nRBC >1% were CHD positive. This discrepancy in the relationship between  
577 high nRBCs and CHD in males versus females likely explains the association between CHD  
578 and global hypomethylation in males and the lack of such association among females, given  
579 the strong effects of nRBC proportions on global methylation levels in DS newborns (17). The  
580 etiology of the male-specific association between high nRBCs and CHD in newborns with DS  
581 remains to be determined.

582

583 Previous studies have reported high nRBC levels in DS newborns with pulmonary  
584 hypertension (41), as well as in hypoxic-related pregnancy situations, such as preeclampsia,  
585 maternal obesity and diabetes, maternal smoking, and prenatal exposure to infection (42–48).  
586 Increased nRBC counts are thought to follow fetal hypoxemia through elevated erythropoietin  
587 (**EPO**), a hormone that stimulates production of erythrocytes (red blood cells) in an effort to  
588 increase oxygen delivery to tissues (49,50). Interestingly, EPO is higher in children with DS-  
589 CHD compared to non-syndromic CHD (51). Because CHDs reduce cerebral oxygen (52)  
590 and may induce fetal hypoxemia (53), high nRBC proportions may be more common in  
591 individuals with CHDs and, in particular, in DS newborns with CHDs given the placental  
592 abnormalities seen in fetuses with trisomy 21 (PMID: 31683073). However, we could not  
593 confirm this hypothesis with our sample size. Moreover, nRBC proportions were estimated  
594 from DNA methylation array data, rather than using actual cell counts, and cell type  
595 deconvolution in individuals with DS may be confounded by the presence of blast cells that  
596 are common in DS and not accounted for in the analysis (17). Cell composition deconvoluted  
597 from DNA methylation arrays has been previously reported to be altered in DS blood  
598 compared to non-DS blood (54). Further, we previously reported a positive relationship  
599 between high nRBC proportions in newborns with DS and presence of somatic *GATA1*  
600 mutations, indicative of transient abnormal myelopoiesis (**TAM**) or silent TAM, and it is  
601 possible that the relationship between CHD and global hypomethylation in males may be  
602 confounded by this preleukemic condition (17). Understanding of the complex relationships  
603 between CHDs in DS, global methylation, cell type proportions, sex, and fetal hypoxia would  
604 benefit from further investigation.

605

606 In our WGBS regional analysis, we found over 10-fold the number of CHD-associated DMRs  
607 in DS males than in females, and even fewer DMRs in the Sex Combined analysis. Reflecting

608 our finding of global hypomethylation in CHD males, 96% of Males Only DMRs were  
609 hypomethylated, a pattern not seen in the Females Only or Sex Combined analyses. All DMRs  
610 were corrected for confounding factors including cell type proportions, suggesting that nRBC  
611 levels were not fully responsible for the notable proportion of hypomethylated DMRs in males,  
612 although we cannot rule out residual confounding due to nRBCs or unmeasured traits related  
613 to nRBCs. Additionally, removing the five male samples with nRBC proportions > 20%  
614 resulted in 82% hypomethylated DMRs, suggesting that these five samples alone were not  
615 driving the signature of hypomethylation in DS-CHD males. Some DMRs from all comparisons  
616 were also differentially methylated in DS vs TD samples, and in males, a significantly higher  
617 proportion of DMRs were methylated in the same direction in DS vs TD and DS-CHD vs DS  
618 non-CHD compared to background regions. These results suggest that male DS patients with  
619 CHD may represent a more severe epigenomic signature than is observed for DS versus TD,  
620 although this may also reflect the higher nRBC proportions that have been reported in  
621 newborns with DS than in TD newborns (Muskens 2021). In contrast, female DS cases with  
622 CHD are somewhat epigenetically distinct from female and male DS cases without CHD.  
623 Response to hypoxia may play a role in these differences. DS newborns, even those without  
624 CHDs, experience more hypoxemia events than newborns with TD (55), and CHDs further  
625 induce fetal hypoxemia (53). A wide variety of sex differences have been observed in  
626 response to hypoxia in both humans and animal models (56,57), including differences in gene  
627 expression profiles of female vs male mice in cardiac adaptive responses to hypoxia (58).  
628 These sex-specific responses to hypoxia may be reflected in the methylome, which is known  
629 to be influenced by gestational hypoxia (59) (reviewed in (60)). Identification of genes and  
630 pathways whose methylation and/or gene expression is altered in DS, CHDs, and hypoxia  
631 may help elucidate the sex specificity of molecular mechanisms related to DS-CHD.  
632

633 Although we did not find any significant DMRs associated with DS-CHD after FDR-correction,  
634 the nominally significant DMRs were enriched for genes implicated in cardiac processes,  
635 suggesting that at least some of the DMRs may reflect true epigenetic mechanisms associated  
636 with DS-CHD development. In particular, Males Only DMRs selected by machine learning  
637 feature selection were able to distinguish CHD from non-CHD samples and frequently  
638 mapped to genes associated with CHDs or cardiomyopathies, including *FUNDC1* (61), *ETV5*  
639 (62,63), *SYT9* (64), *CAMTA1* (65), *GRIA4* (66), and *IGF1R* (67–70). Additionally, DMRs that  
640 contributed to enrichment for heart-related gene ontology terms included *TNNI3*, a cardiac-  
641 specific gene that codes for cardiac troponin I, whose absence leads to severe pediatric  
642 cardiomyopathy (71), and *GATA4*, which encodes a member of the GATA family of zinc finger  
643 transcription factors, is essential for mammalian cardiac development, and whose sequence  
644 variants have been identified in individuals with CHDs (72). Whether the differential  
645 methylation in the genes we identified plays an etiologic role or reflects epigenomic effects  
646 downstream of the development of CHDs remains to be determined.

647  
648 While this is, to our knowledge, the largest DNA methylation study of CHDs in DS, our sample  
649 size of 86 DS newborns may still have limited our ability to detect genome-wide significant ( $q$   
650  $<0.05$ ) DMRs. Additionally, only around half of DMRs in all comparisons were methylated in  
651 the same direction in the discovery and replication groups, potentially due to the very small  
652 sample sizes and absence of confounding variable data to use for correction in the replication  
653 group, as well as high interindividual variation in methylation. The genes to which our DMRs  
654 mapped did not heavily coincide with those identified in previous epigenetic studies of DS-  
655 CHD (73,74), likely because those studies included small numbers of DS subjects, used non-  
656 NDBS biospecimens assayed with array-based methods, which do not have good coverage  
657 over the regions we detected using WGBS, and did not account for cell type heterogeneity.  
658 One exception to this is that we identified a DMR in the Males Only comparison that mapped

659 to *SHC3*, a gene that was differentially expressed in DS individuals with an endocardial  
660 cushion CHD (73). The DS field would benefit from further studies into the etiology and  
661 biomarkers of phenotypes common in the DS population, including CHDs.

662

## 663 **5. Conclusions**

664 Overall, this study presents the largest investigation of epigenetic variation associated with  
665 CHDs in individuals with DS. We identified sex-specific global and regional methylation  
666 differences in DS-CHD vs DS non-CHD newborns. Specifically, in males we found that  
667 newborns with DS-CHD were globally hypomethylated compared to DS newborns without  
668 CHD, a finding that appeared to be driven by differences in nRBC proportions between the  
669 two groups. At the regional level, the majority of CHD DMRs identified by sex stratification did  
670 not overlap by genomic coordinates, suggesting sex differences in the molecular signature of  
671 CHDs in DS. Gene ontology analysis of DMRs from both sexes revealed enrichment in  
672 pathways related to the heart, and some DS-CHD DMRs were also differentially methylated  
673 in DS vs TD samples. Our results provide insight into the development of CHDs in newborns  
674 with DS, pointing to sex-specific differences that warrant further investigation, and suggest  
675 that DNA methylation may serve as a useful biomarker for investigating the variability of  
676 clinical features within the genetic disorder of DS.

677

678

679

## 680 **DECLARATIONS**

### 681 **Ethics approval and consent to participate**

682 This study was approved by Institutional Review Boards at the California Health and Human  
683 Services Agency, University of Southern California, and University of California Davis.

684

### 685 **Consent for publication**



686 Deidentified NDBS were obtained from the California Biobank Program (SIS request number  
687 572), with a waiver of consent from the Committee for the Protection of Human Subjects of  
688 the State of California.

689

### 690 **Availability of data and materials**

691 This study used biospecimens from the California Biobank Program. Any uploading of  
692 genomic data (including genome-wide DNA methylation data) and/or sharing of these  
693 biospecimens or individual data derived from these biospecimens has been determined to  
694 violate the statutory scheme of the California Health and Safety Code Sections 124980(j),  
695 124991(b), (g), (h), and 103850 (a) and (d), which protect the confidential nature of  
696 biospecimens and individual data derived from biospecimens. Should we be contacted  
697 regarding individual-level data contributing to the findings reported in this study, inquiries will  
698 be directed to the California Department of Public Health Institutional Review Board to  
699 establish an approved protocol to utilize the data, which cannot otherwise be shared peer-  
700 to-peer.

701

702 Code is available at

703 [https://github.com/juliamouat/DownSyndrome\\_CongenitalHeartDefect\\_DNAMethylation](https://github.com/juliamouat/DownSyndrome_CongenitalHeartDefect_DNAMethylation)

704

### 705 **Competing interests**

706 The authors declare that they have no competing interests.

707

### 708 **Funding**

709 This work was supported by National Institutes of Health NIEHS T32 ES007059 (JSM) and  
710 P30 ES023513 (JML); an Alex's Lemonade Stand Foundation 'A' Award (AJD); Canadian

711 Institutes of Health Research (CIHR) postdoctoral fellowship MFE-146824 (BIL); CIHR

712 Banting postdoctoral fellowship BPF-162684 (BIL)

713

#### 714 **Authors' contributions**

715 BIL, AJD, and JML designed the study. AJD and JML supervised the project. AJD, PJL,

716 JPW, and JMS prepared data. SSM performed DNA extractions. SL performed array

717 analysis. JSM performed bioinformatic analyses. JSM, AJD, and JML interpreted results.

718 JSM drafted the manuscript and made figures and tables. PJL, AJD, and JML revised the

719 manuscript. All authors reviewed and approved the final manuscript.

720

#### 721 **Acknowledgements**

722 A subset of biospecimens and/or data used in this study were obtained from the California

723 Biobank Program at the California Department of Public Health (CDPH), SIS request

724 number 572, in accordance with Section 6555(b), 17 CCR. The CDPH is not responsible for

725 the results or conclusions drawn by the authors of this publication.

726

727 We thank Robin Cooley and Steve Graham (Genetic Disease Screening Program, CDPH)

728 for their assistance and expertise in the procurement and management of NDBS

729 specimens. We thank the DNA Technologies and Expression Analysis Core at the UC Davis

730 Genome Center for library preparation and WGBS.

731

732

#### 733 **REFERENCES**

734

735 1. Antonarakis SE, Skotko BG, Rafii MS, Strydom A, Pape SE, Bianchi DW, et al. Down  
736 syndrome. Nat Rev Dis Primers. 2020 Feb 6;6(1):9.

737 2. Dobosz A, Bik-Multanowski M. Long-term Trends in the Prevalence of Congenital Heart  
738 Defects in Patients with Down Syndrome in Southern Poland. Dev Period Med. 2019 Oct  
739 27;23(3):184–9.

- 740 3. Irving CA, Chaudhari MP. Cardiovascular abnormalities in Down's syndrome: spectrum,  
741 management and survival over 22 years. *Arch Dis Child*. 2012 Apr;97(4):326–30.
- 742 4. Laursen HB. Congenital heart disease in Down's syndrome. *Br Heart J*. 1976 Jan;38(1):32–  
743 8.
- 744 5. Weijerman ME, van Furth AM, Vonk Noordegraaf A, van Wouwe JP, Broers CJM, Gemke  
745 RJJ. Prevalence, neonatal characteristics, and first-year mortality of Down syndrome: a  
746 national study. *J Pediatr*. 2008 Jan;152(1):15–9.
- 747 6. Mai CT, Isenburg JL, Canfield MA, Meyer RE, Correa A, Alverson CJ, et al. National  
748 population-based estimates for major birth defects, 2010–2014. *Birth Defects Res*. 2019 Nov  
749 1;111(18):1420–35.
- 750 7. Korbel JO, Tirosh-Wagner T, Urban AE, Chen XN, Kasowski M, Dai L, et al. The genetic  
751 architecture of Down syndrome phenotypes revealed by high-resolution analysis of human  
752 segmental trisomies. *Proc Natl Acad Sci U S A*. 2009 Jul 21;106(29):12031–6.
- 753 8. Ackerman C, Locke AE, Feingold E, Reshey B, Espana K, Thusberg J, et al. An Excess of  
754 Deleterious Variants in VEGF-A Pathway Genes in Down-Syndrome-Associated  
755 Atrioventricular Septal Defects. *Am J Hum Genet*. 2012 Oct 5;91(4):646–59.
- 756 9. Ramachandran D, Mulle JG, Locke AE, Bean LJH, Rosser TC, Bose P, et al. Contribution of  
757 Copy Number Variation to Down Syndrome-associated Atrioventricular Septal Defects.  
758 *Genet Med*. 2015 Jul;17(7):554–60.
- 759 10. Ramachandran D, Zeng Z, Locke AE, Mulle JG, Bean LJH, Rosser TC, et al. Genome-Wide  
760 Association Study of Down Syndrome-Associated Atrioventricular Septal Defects. *G3*  
761 (Bethesda). 2015 Jul 20;5(10):1961–71.
- 762 11. Rambo-Martin BL, Mulle JG, Cutler DJ, Bean LJH, Rosser TC, Dooley KJ, et al. Analysis  
763 of Copy Number Variants on Chromosome 21 in Down Syndrome-Associated Congenital  
764 Heart Defects. *G3 (Bethesda)*. 2017 Nov 15;8(1):105–11.
- 765 12. Sailani MR, Makrythanasis P, Valsesia A, Santoni FA, Deutsch S, Popadin K, et al. The  
766 complex SNP and CNV genetic architecture of the increased risk of congenital heart defects  
767 in Down syndrome. *Genome Res*. 2013 Sep;23(9):1410–21.
- 768 13. Trevino CE, Holleman AM, Corbitt H, Maslen CL, Rosser TC, Cutler DJ, et al. Identifying  
769 genetic factors that contribute to the increased risk of congenital heart defects in infants with  
770 Down syndrome. *Sci Rep*. 2020 Oct 22;10(1):18051.
- 771 14. Cao J, Wu Q, Huang Y, Wang L, Su Z, Ye H. The role of DNA methylation in syndromic  
772 and non-syndromic congenital heart disease. *Clinical Epigenetics*. 2021 Apr 26;13(1):93.
- 773 15. Vecoli C, Pulignani S, Foffa I, Andreassi MG. Congenital Heart Disease: The Crossroads of  
774 Genetics, Epigenetics and Environment. *Curr Genomics*. 2014 Oct;15(5):390–9.

- 775 16. Laufer BI, Hwang H, Jianu JM, Mordaunt CE, Korf IF, Hertz-Picciotto I, et al. Low-Pass  
776 Whole Genome Bisulfite Sequencing of Neonatal Dried Blood Spots Identifies a Role for  
777 RUNX1 in Down Syndrome DNA Methylation Profiles. *Hum Mol Genet.* 2020 Oct 1;
- 778 17. Muskens IS, Li S, Jackson T, Elliot N, Hansen HM, Myint SS, et al. The genome-wide  
779 impact of trisomy 21 on DNA methylation and its implications for hematopoiesis. *Nat*  
780 *Commun.* 2021 Feb 5;12:821.
- 781 18. Croen LA, Shaw GM, Jensvold NG, Harris JA. Birth defects monitoring in California: a  
782 resource for epidemiological research. *Paediatric and Perinatal Epidemiology.*  
783 1991;5(4):423–7.
- 784 19. Laufer BI. FASTQ\_Me [Internet]. 2020 [cited 2023 Feb 28]. Available from:  
785 [https://github.com/ben-laufer/FASTQ\\_Me](https://github.com/ben-laufer/FASTQ_Me)
- 786 20. Laufer BI. CpG\_Me [Internet]. 2022 [cited 2022 Jan 20]. Available from:  
787 [https://github.com/ben-laufer/CpG\\_Me](https://github.com/ben-laufer/CpG_Me)
- 788 21. Ewels P, Magnusson M, Lundin S, Källér M. MultiQC: summarize analysis results for  
789 multiple tools and samples in a single report. *Bioinformatics.* 2016 Oct 1;32(19):3047–8.
- 790 22. Krueger F, Andrews SR. Bismark: a flexible aligner and methylation caller for Bisulfite-Seq  
791 applications. *Bioinformatics.* 2011 Jun 1;27(11):1571–2.
- 792 23. Laufer BI, Neier K, Valenzuela AE, Yasui DH, Schmidt RJ, Lein PJ, et al. Placenta and fetal  
793 brain share a neurodevelopmental disorder DNA methylation profile in a mouse model of  
794 prenatal PCB exposure. *Cell Reports.* 2022 Mar;38(9):110442.
- 795 24. Martin M. Cutadapt removes adapter sequences from high-throughput sequencing reads.  
796 *EMBnet.journal.* 2011 May 2;17(1):10–2.
- 797 25. Xu Z, Xie C, Taylor JA, Niu L. ipDMR: identification of differentially methylated regions  
798 with interval P-values. *Bioinformatics.* 2020 Aug 17;37(5):711–3.
- 799 26. Koestler DC, Jones MJ, Usset J, Christensen BC, Butler RA, Kobor MS, et al. Improving  
800 cell mixture deconvolution by identifying optimal DNA methylation libraries (IDOL). *BMC*  
801 *Bioinformatics.* 2016 Mar 8;17:120.
- 802 27. Hansen KD, Langmead B, Irizarry RA. BSmooth: from whole genome bisulfite sequencing  
803 reads to differentially methylated regions. *Genome Biology.* 2012 Oct 3;13(10):R83.
- 804 28. Korthauer K, Chakraborty S, Benjamini Y, Irizarry RA. Detection and accurate false  
805 discovery rate control of differentially methylated regions from whole genome bisulfite  
806 sequencing. *Biostatistics.* 2019 Jul 1;20(3):367–83.
- 807 29. Haftorn KL, Denault WRP, Lee Y, Page CM, Romanowska J, Lyle R, et al. Nucleated red  
808 blood cells explain most of the association between DNA methylation and gestational age.  
809 *Commun Biol.* 2023 Feb 27;6(1):1–11.

- 810 30. Kursa MB, Rudnicki WR. Feature Selection with the Boruta Package. *Journal of Statistical*  
811 *Software*. 2010 Sep 16;36:1–13.
- 812 31. Das P, Roychowdhury A, Das S, Roychoudhury S, Tripathy S. sigFeature: Novel Significant  
813 Feature Selection Method for Classification of Gene Expression Data Using Support Vector  
814 Machine and t Statistic. *Frontiers in Genetics* [Internet]. 2020 [cited 2023 Feb 13];11.  
815 Available from: <https://www.frontiersin.org/articles/10.3389/fgene.2020.00247>
- 816 32. Lawrence M, Gentleman R, Carey V. rtracklayer: an R package for interfacing with genome  
817 browsers. *Bioinformatics*. 2009 Jul 15;25(14):1841–2.
- 818 33. Lawrence M, Huber W, Pagès H, Aboyoun P, Carlson M, Gentleman R, et al. Software for  
819 Computing and Annotating Genomic Ranges. *PLOS Computational Biology*. 2013 Aug  
820 8;9(8):e1003118.
- 821 34. Chen H, Boutros PC. VennDiagram: a package for the generation of highly-customizable  
822 Venn and Euler diagrams in R. *BMC Bioinformatics*. 2011 Jan 26;12(1):35.
- 823 35. Huang DW, Sherman BT, Lempicki RA. Systematic and integrative analysis of large gene  
824 lists using DAVID bioinformatics resources. *Nat Protoc*. 2009;4(1):44–57.
- 825 36. Huang DW, Sherman BT, Lempicki RA. Bioinformatics enrichment tools: paths toward the  
826 comprehensive functional analysis of large gene lists. *Nucleic Acids Res*. 2009 Jan;37(1):1–  
827 13.
- 828 37. McLean CY, Bristor D, Hiller M, Clarke SL, Schaar BT, Lowe CB, et al. GREAT improves  
829 functional interpretation of cis-regulatory regions. *Nat Biotechnol*. 2010 May;28(5):495–  
830 501.
- 831 38. de Goede OM, Lavoie PM, Robinson WP. Characterizing the hypomethylated DNA  
832 methylation profile of nucleated red blood cells from cord blood. *Epigenomics*. 2016  
833 Nov;8(11):1481–94.
- 834 39. Salas LA, Zhang Z, Koestler DC, Butler RA, Hansen HM, Molinaro AM, et al. Enhanced  
835 cell deconvolution of peripheral blood using DNA methylation for high-resolution immune  
836 profiling. *Nat Commun*. 2022 Feb 9;13(1):761.
- 837 40. Mordaunt CE, Jianu JM, Laufer B, Zhu Y, Dunaway KW, Bakulski KM, et al. Cord blood  
838 DNA methylome in newborns later diagnosed with autism spectrum disorder reflects early  
839 dysregulation of neurodevelopmental and X-linked genes [Internet]. *Genomics*; 2019 Nov  
840 [cited 2020 Apr 15]. Available from: <http://biorxiv.org/lookup/doi/10.1101/850529>
- 841 41. Nitzan I, Kasirer Y, Mimouni FB, Fink D, Wasserteil N, Hammerman C, et al. Elevated  
842 Nucleated Red Blood Cells in Neonates with Down Syndrome and Pulmonary Hypertension.  
843 *J Pediatr*. 2019 Oct;213:232–4.

- 844 42. Aali BS, Malekpour R, Sedig F, Safa A. Comparison of maternal and cord blood nucleated  
845 red blood cell count between pre-eclamptic and healthy women. *J Obstet Gynaecol Res.*  
846 2007 Jun;33(3):274–8.
- 847 43. Baschat AA, Gungor S, Kush ML, Berg C, Gembruch U, Harman CR. Nucleated red blood  
848 cell counts in the first week of life: a critical appraisal of relationships with perinatal  
849 outcome in preterm growth-restricted neonates. *Am J Obstet Gynecol.* 2007  
850 Sep;197(3):286.e1-8.
- 851 44. de Goede OM, Razzaghian HR, Price EM, Jones MJ, Kobor MS, Robinson WP, et al.  
852 Nucleated red blood cells impact DNA methylation and expression analyses of cord blood  
853 hematopoietic cells. *Clinical Epigenetics.* 2015 Sep 11;7(1):95.
- 854 45. Hermansen M. Nucleated red blood cells in the fetus and newborn. *Arch Dis Child Fetal*  
855 *Neonatal Ed.* 2001 May;84(3):F211–5.
- 856 46. Redline RW. Elevated circulating fetal nucleated red blood cells and placental pathology in  
857 term infants who develop cerebral palsy. *Hum Pathol.* 2008 Sep;39(9):1378–84.
- 858 47. Yeruchimovich M, Dollberg S, Green DW, Mimouni FB. Nucleated red blood cells in  
859 infants of smoking mothers. *Obstet Gynecol.* 1999 Mar;93(3):403–6.
- 860 48. Yeruchimovich M, Mimouni FB, Green DW, Dollberg S. Nucleated red blood cells in  
861 healthy infants of women with gestational diabetes. *Obstet Gynecol.* 2000 Jan;95(1):84–6.
- 862 49. Bedrick AD. Nucleated red blood cells and fetal hypoxia: a biologic marker whose ‘timing’  
863 has come? *J Perinatol.* 2014 Feb;34(2):85–6.
- 864 50. Teramo KA, Widness JA. Increased Fetal Plasma and Amniotic Fluid Erythropoietin  
865 Concentrations: Markers of Intrauterine Hypoxia. *Neonatology.* 2009 Feb;95(2):105–16.
- 866 51. Zakharchenko L, EL-Khuffash A, Hurley T, Kelly L, Melo A, Padden M, et al. Infants with  
867 Down syndrome and congenital heart disease have altered peri-operative immune responses.  
868 *Pediatr Res.* 2022 Mar 29;1–8.
- 869 52. Morton PD, Korotcova L, Lewis BK, Bhuvanendran S, Ramachandra SD, Zurakowski D, et  
870 al. Abnormal neurogenesis and cortical growth in congenital heart disease. *Sci Transl Med.*  
871 2017 Jan 25;9(374):eaah7029.
- 872 53. Peyvandi S, Xu D, Wang Y, Hogan W, Moon-Grady A, Barkovich AJ, et al. Fetal Cerebral  
873 Oxygenation Is Impaired in Congenital Heart Disease and Shows Variable Response to  
874 Maternal Hyperoxia. *Journal of the American Heart Association.* 2021 Jan 5;10(1):e018777.
- 875 54. Zhang Z, Stolrow HG, Christensen BC, Salas LA. Down Syndrome Altered Cell  
876 Composition in Blood, Brain, and Buccal Swab Samples Profiled by DNA-Methylation-  
877 Based Cell-Type Deconvolution. *Cells.* 2023 Jan;12(8):1168.

- 878 55. Krahn KN, Nagraj VP, McCulloch MA, Zimmet AM, Fairchild KD. Hypoxemia in infants  
879 with Trisomy 21 in the Neonatal Intensive Care Unit. *J Perinatol*. 2021 Jun;41(6):1448–53.
- 880 56. Horiuchi M, Kirihara Y, Fukuoka Y, Pontzer H. Sex differences in respiratory and  
881 circulatory cost during hypoxic walking: potential impact on oxygen saturation. *Sci Rep*.  
882 2019 Jul 2;9(1):9550.
- 883 57. Mayoral SR, Omar G, Penn AA. Sex Differences in a Hypoxia Model of Preterm Brain  
884 Damage. *Pediatr Res*. 2009 Sep;66(3):248–53.
- 885 58. Bohuslavová R, Kolář F, Kuthanová L, Neckář J, Tichopád A, Pavlinkova G. Gene  
886 expression profiling of sex differences in HIF1-dependent adaptive cardiac responses to  
887 chronic hypoxia. *Journal of Applied Physiology*. 2010 Oct;109(4):1195–202.
- 888 59. Zhu Y, Gomez JA, Laufer BI, Mordaunt CE, Mouat JS, Soto DC, et al. Placental methylome  
889 reveals a 22q13.33 brain regulatory gene locus associated with autism. *Genome Biology*.  
890 2022 Feb 16;23(1):46.
- 891 60. Ma Q, Xiong F, Zhang L. Gestational hypoxia and epigenetic programming of brain  
892 development disorders. *Drug Discov Today*. 2014 Dec;19(12):1883–96.
- 893 61. Liu L, Li Y, Chen Q. The Emerging Role of FUNDC1-Mediated Mitophagy in  
894 Cardiovascular Diseases. *Frontiers in Physiology* [Internet]. 2021 [cited 2023 Mar 2];12.  
895 Available from: <https://www.frontiersin.org/articles/10.3389/fphys.2021.807654>
- 896 62. Liu Y, Lu P, Wang Y, Morrow BE, Zhou B, Zheng D. Spatiotemporal Gene Coexpression  
897 and Regulation in Mouse Cardiomyocytes of Early Cardiac Morphogenesis. *J Am Heart*  
898 *Assoc*. 2019 Jul 19;8(15):e012941.
- 899 63. Tan WLW, Anene-Nzeliu CG, Wong E, Lee CJM, Tan HS, Tang SJ, et al. Epigenomes of  
900 Human Hearts Reveal New Genetic Variants Relevant for Cardiac Disease and Phenotype.  
901 *Circulation Research*. 2020 Aug 28;127(6):761–77.
- 902 64. Xie HH, Li J, Li PQ, Zhang AA, Li Y, Wang YZ, et al. A genetic variant in a homocysteine  
903 metabolic gene that increases the risk of congenital cardiac septal defects in Han Chinese  
904 populations. *IUBMB Life*. 2017 Sep;69(9):700–5.
- 905 65. Song K, Backs J, McAnally J, Qi X, Gerard RD, Richardson JA, et al. The Transcriptional  
906 Coactivator CAMTA2 Stimulates Cardiac Growth by Opposing Class II Histone  
907 Deacetylases. *Cell*. 2006 May 5;125(3):453–66.
- 908 66. Izarzugaza JMG, Ellesøe SG, Doganli C, Ehlers NS, Dalgaard MD, Audain E, et al. Systems  
909 genetics analysis identifies calcium-signaling defects as novel cause of congenital heart  
910 disease. *Genome Medicine*. 2020 Aug 28;12(1):76.
- 911 67. Benbouchta Y, De Leeuw N, Amasdl S, Sbiti A, Smeets D, Sadki K, et al. 15q26 deletion in  
912 a patient with congenital heart defect, growth restriction and intellectual disability: case  
913 report and literature review. *Italian Journal of Pediatrics*. 2021 Sep 16;47(1):188.

- 914 68. González-Guerra JL, Castilla-Cortazar I, Aguirre GA, Muñoz Ú, Martín-Estal I, Ávila-  
915 Gallego E, et al. Partial IGF-1 deficiency is sufficient to reduce heart contractibility,  
916 angiotensin II sensibility, and alter gene expression of structural and functional cardiac  
917 proteins. PLOS ONE. 2017 Aug 14;12(8):e0181760.
- 918 69. Huynh K, McMullen JR, Julius TL, Tan JW, Love JE, Cemerlang N, et al. Cardiac-specific  
919 IGF-1 receptor transgenic expression protects against cardiac fibrosis and diastolic  
920 dysfunction in a mouse model of diabetic cardiomyopathy. Diabetes. 2010 Jun;59(6):1512–  
921 20.
- 922 70. Ock S, Lee WS, Ahn J, Kim HM, Kang H, Kim HS, et al. Deletion of IGF-1 Receptors in  
923 Cardiomyocytes Attenuates Cardiac Aging in Male Mice. Endocrinology. 2016  
924 Jan;157(1):336–45.
- 925 71. Kühnisch J, Herbst C, Al-Wakeel-Marquard N, Dartsch J, Holtgrewe M, Baban A, et al.  
926 Targeted panel sequencing in pediatric primary cardiomyopathy supports a critical role of  
927 TNNI3. Clinical Genetics. 2019;96(6):549–59.
- 928 72. Tomita-Mitchell A, Maslen CL, Morris CD, Garg V, Goldmuntz E. GATA4 sequence  
929 variants in patients with congenital heart disease. J Med Genet. 2007 Dec;44(12):779–83.
- 930 73. Dobosz A, Grabowska A, Bik-Multanowski M. Hypermethylation of NRG1 gene correlates  
931 with the presence of heart defects in Down’s syndrome. J Genet. 2019 Dec;98:110.
- 932 74. Serra-Juhé C, Cuscó I, Homs A, Flores R, Torán N, Pérez-Jurado LA. DNA methylation  
933 abnormalities in congenital heart disease. Epigenetics. 2015 Jan 14;10(2):167–77.
- 934
